# Supplementary material for: Design, Synthesis, and Biological Evaluation of the Quorum-Sensing Inhibitors of Pseudomonas aeruginosa PAO1
Source: MDPI journal article supplement (doi:10.3390/molecules29102211), 2024-05-08

# Supplemental information

## Design, synthesis, and biological evaluation of the quorum-sensing inhibitors of *Pseudomonas aeruginosa* PAO1

1 National Engineering Research Center for the Emergency Drug, State Key Laboratory of Toxicology and Medical Countermeasures, Beijing Institute of Pharmacology and Toxicology, Beijing 100850, China; yanxinlin11@163.com (X.Y.) houshi28@126.com (S.H.); jiajiachang@126.com (J.C.);

2 School of Pharmaceutical Sciences, Jilin University, Changchun 130021, China; xingcheng21@mails.jlu.edu.cn (C.X.)

3 School of Life Sciences, Jilin University, Changchun, 130012, China; yuanyuanz21@mails.jlu.edu.cn (Y.Z)

\* Correspondence: xiaojunhai@139.com (J.X); Tel.:01066931634

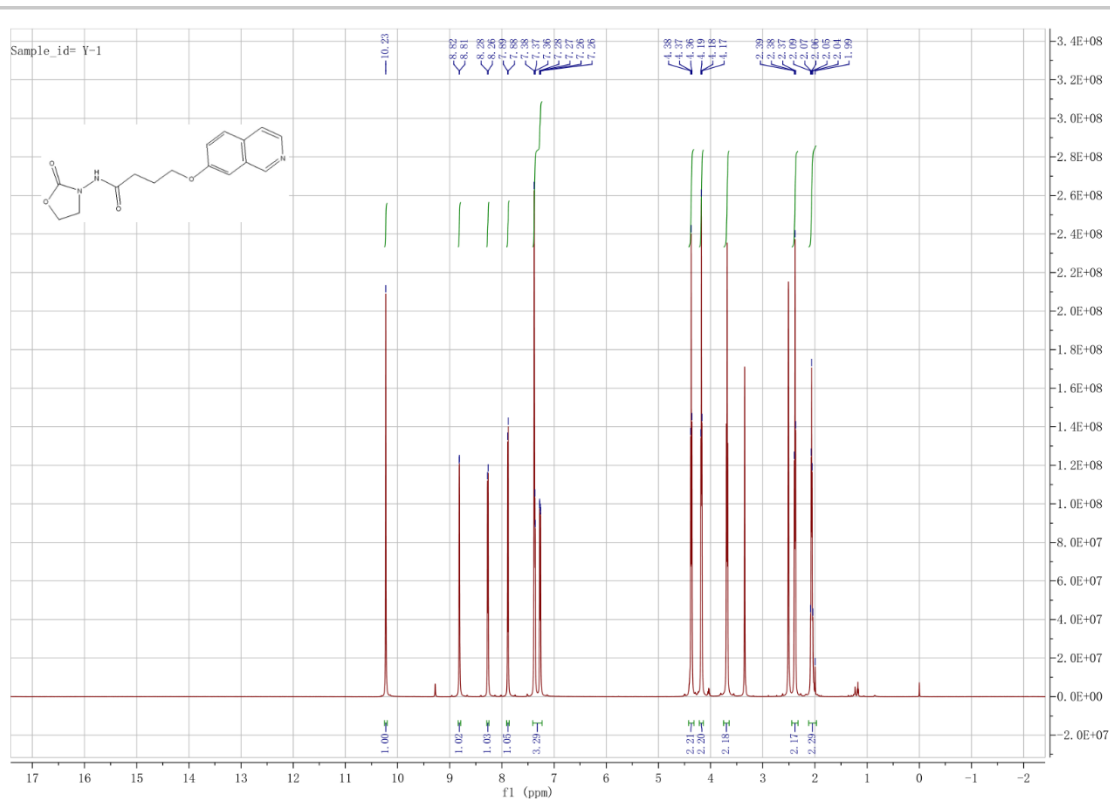

The  $^1\text{H}$ -NMR spectrum of compound Y-1

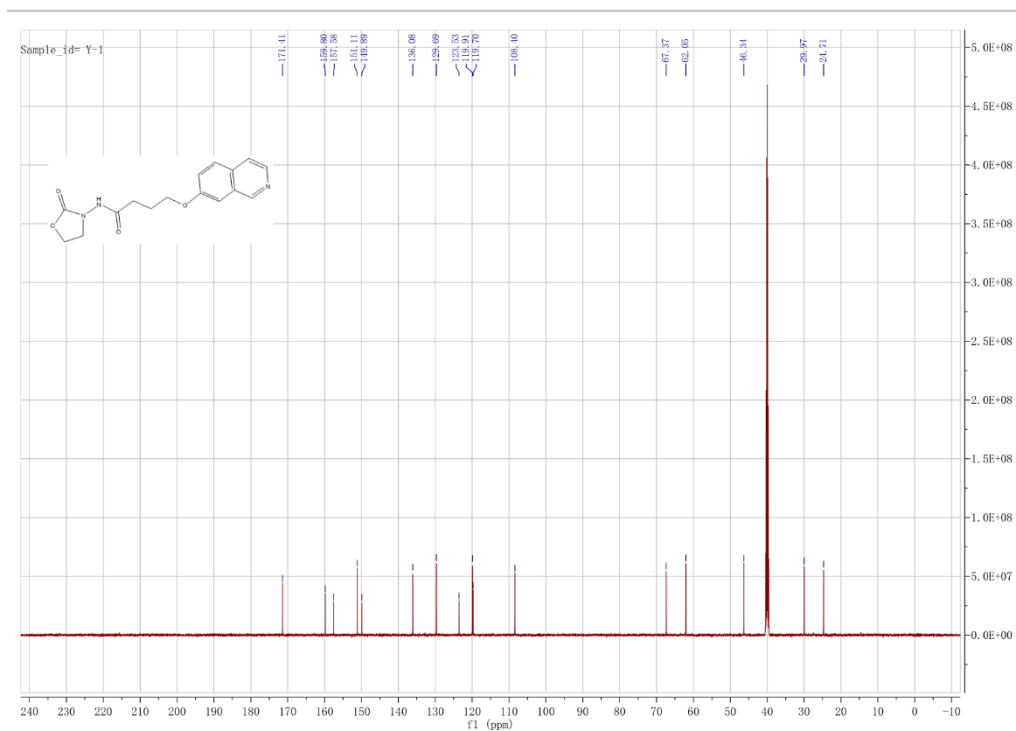

The  $^{13}\text{C}$  NMR spectrum of compound Y-1

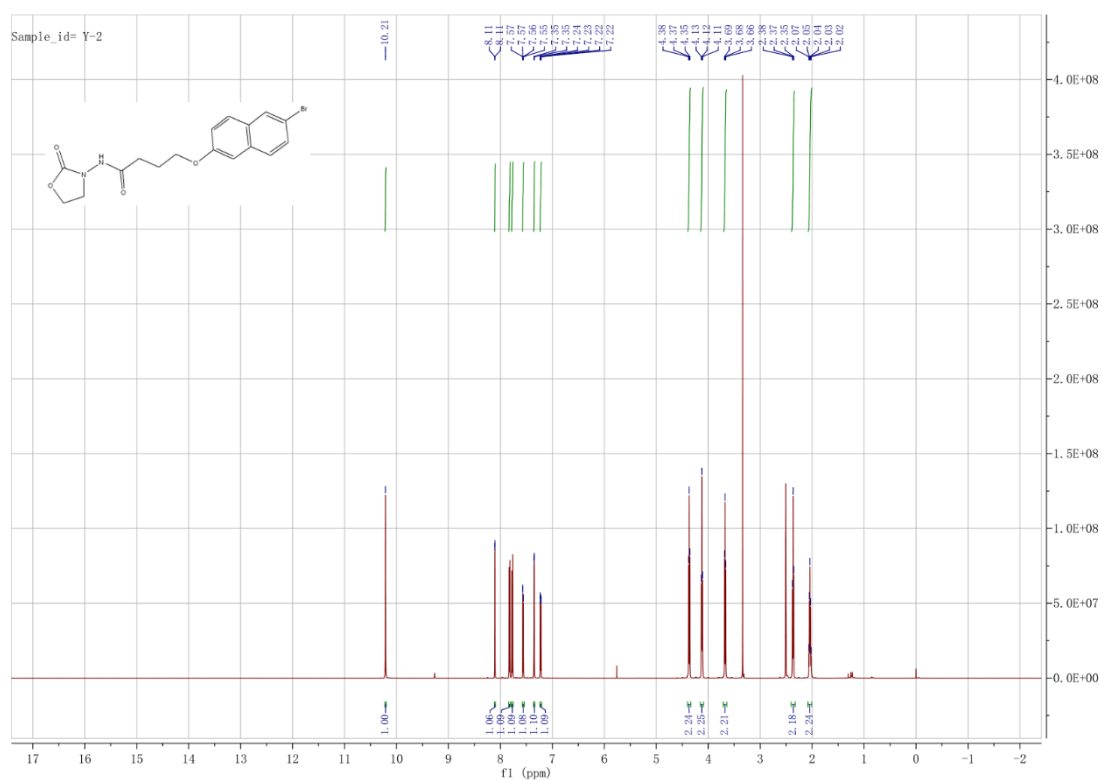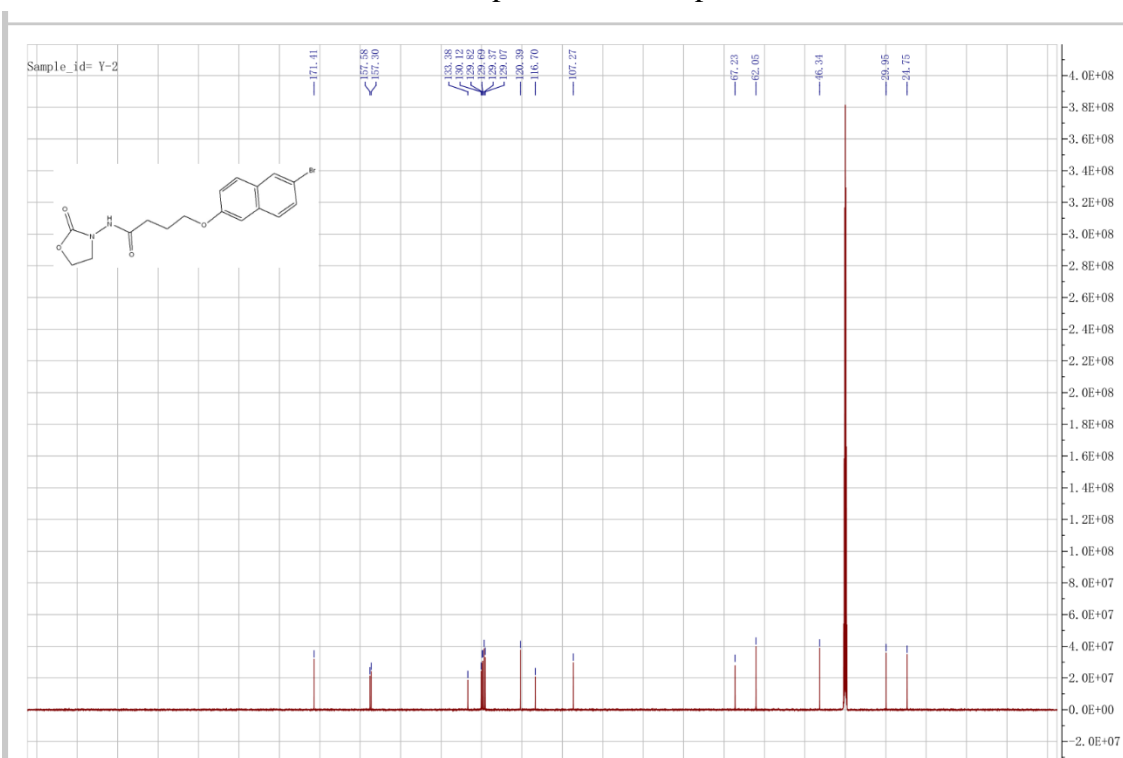

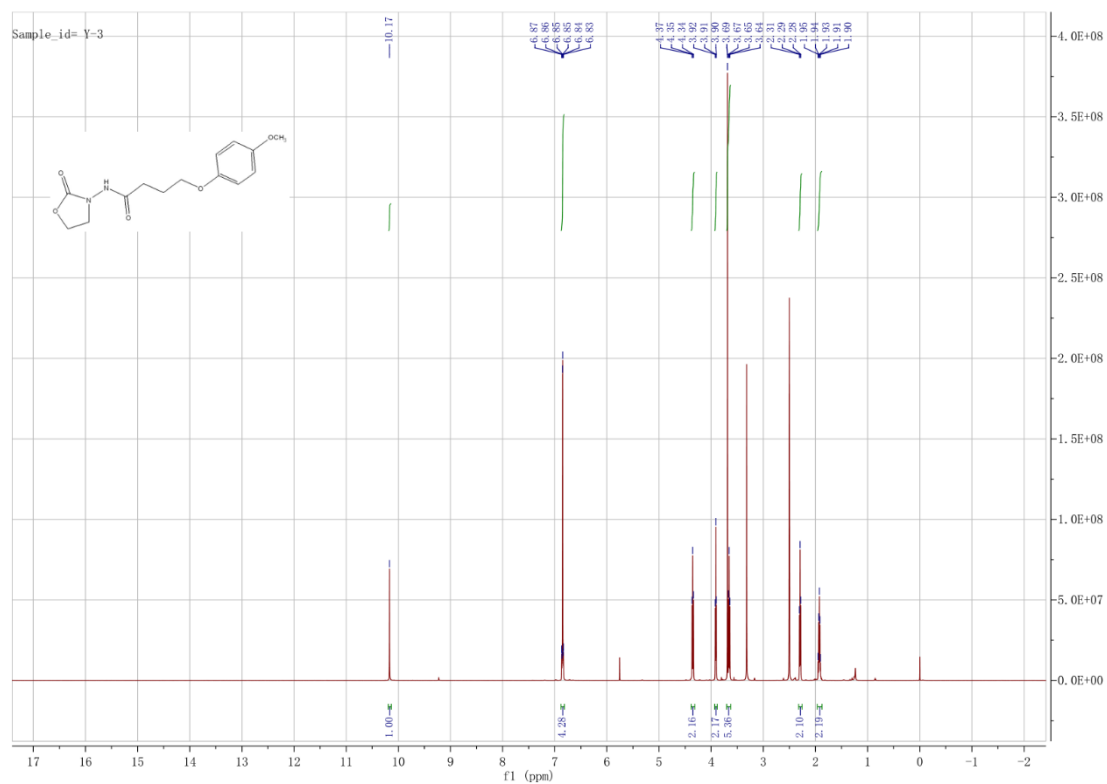

The  $^1\text{H}$ -NMR spectrum of compound Y-3

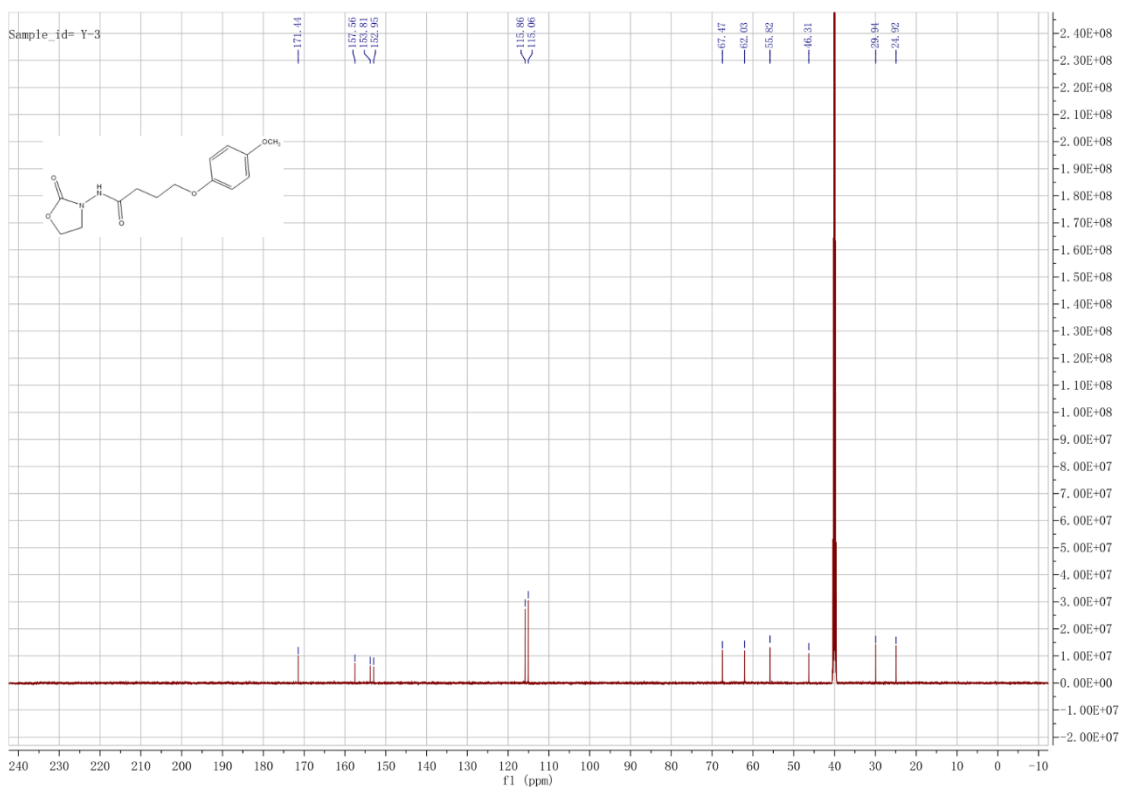

The  $^{13}\text{C}$  NMR spectrum of compound Y-3

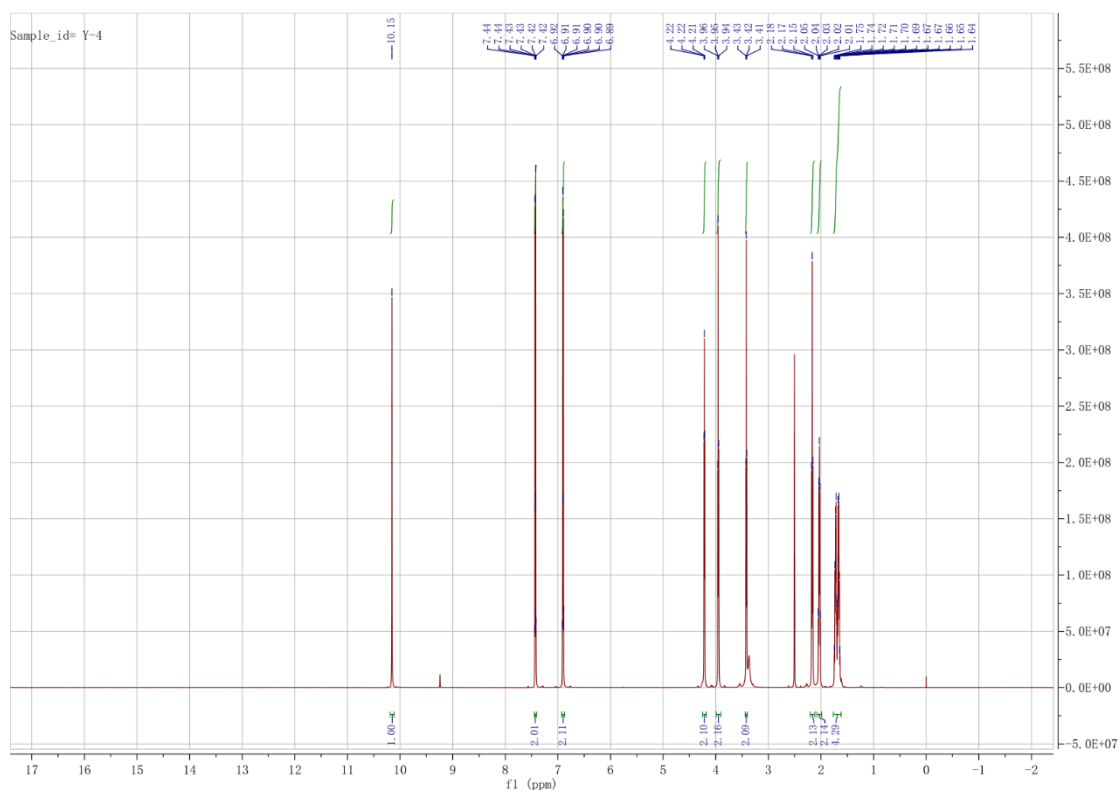

The  $^1\text{H}$ -NMR spectrum of compound Y-4

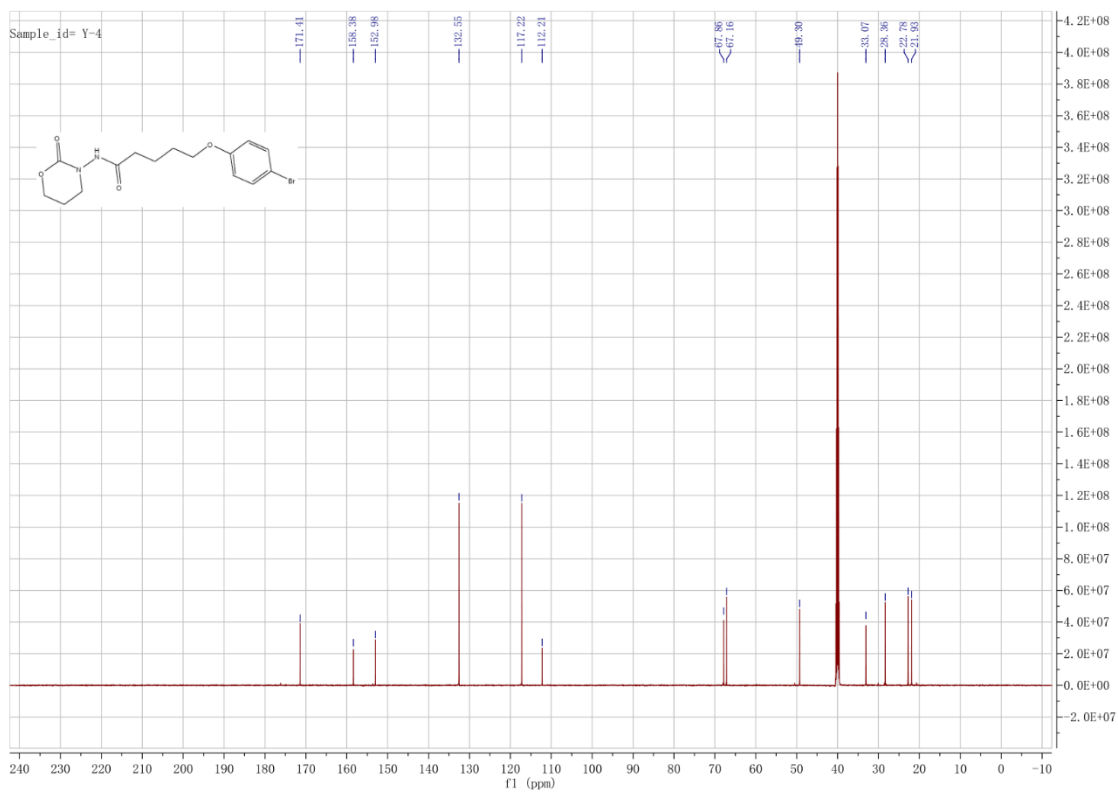

The  $^{13}\text{C}$  NMR spectrum of compound Y-4

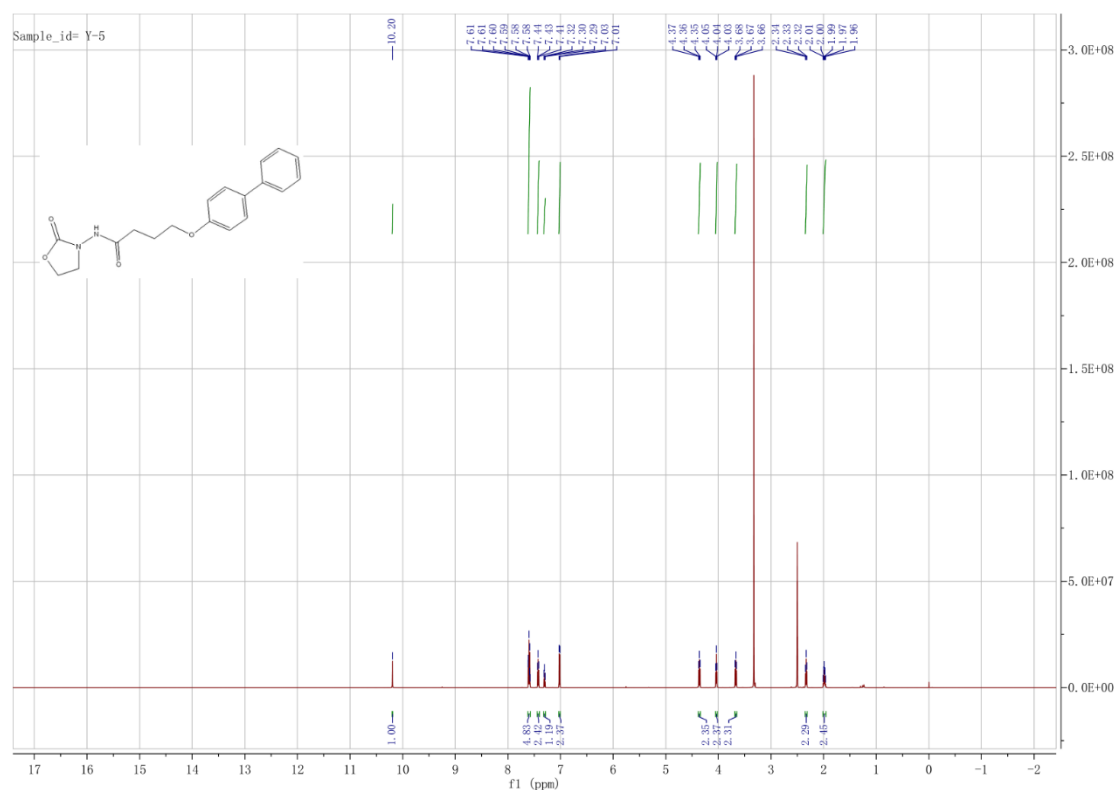

The  $^1\text{H}$ -NMR spectrum of compound Y-5

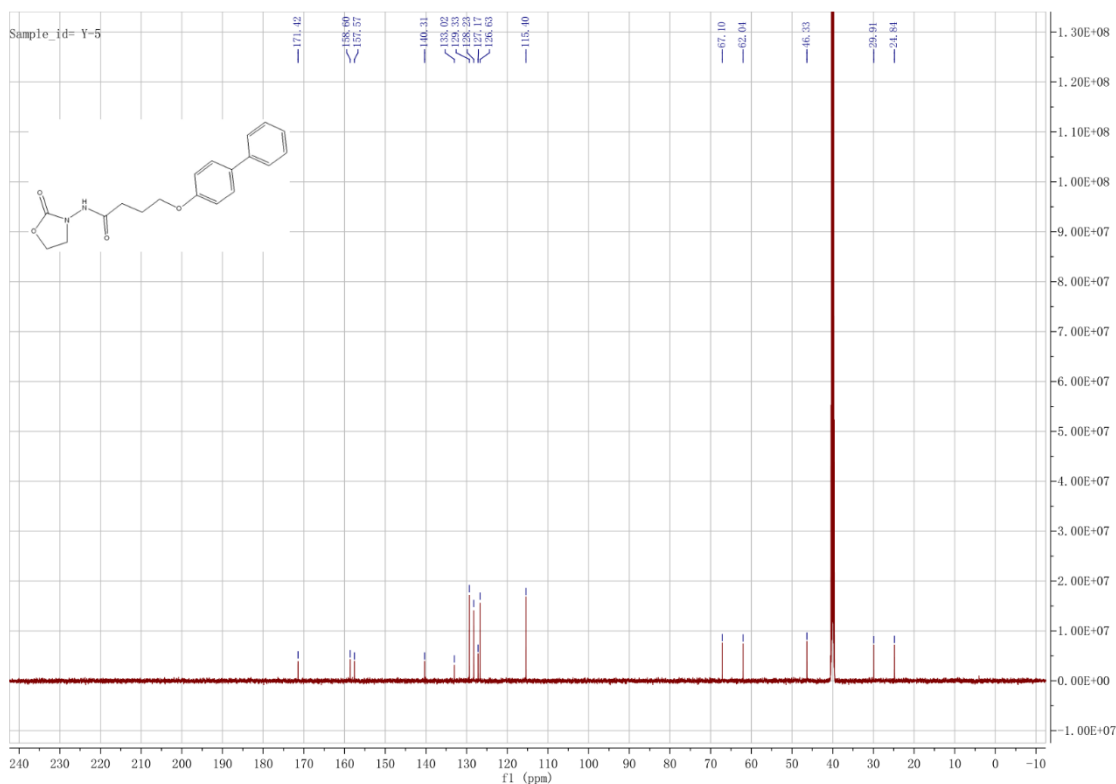

The  $^{13}\text{C}$  NMR spectrum of compound Y-5

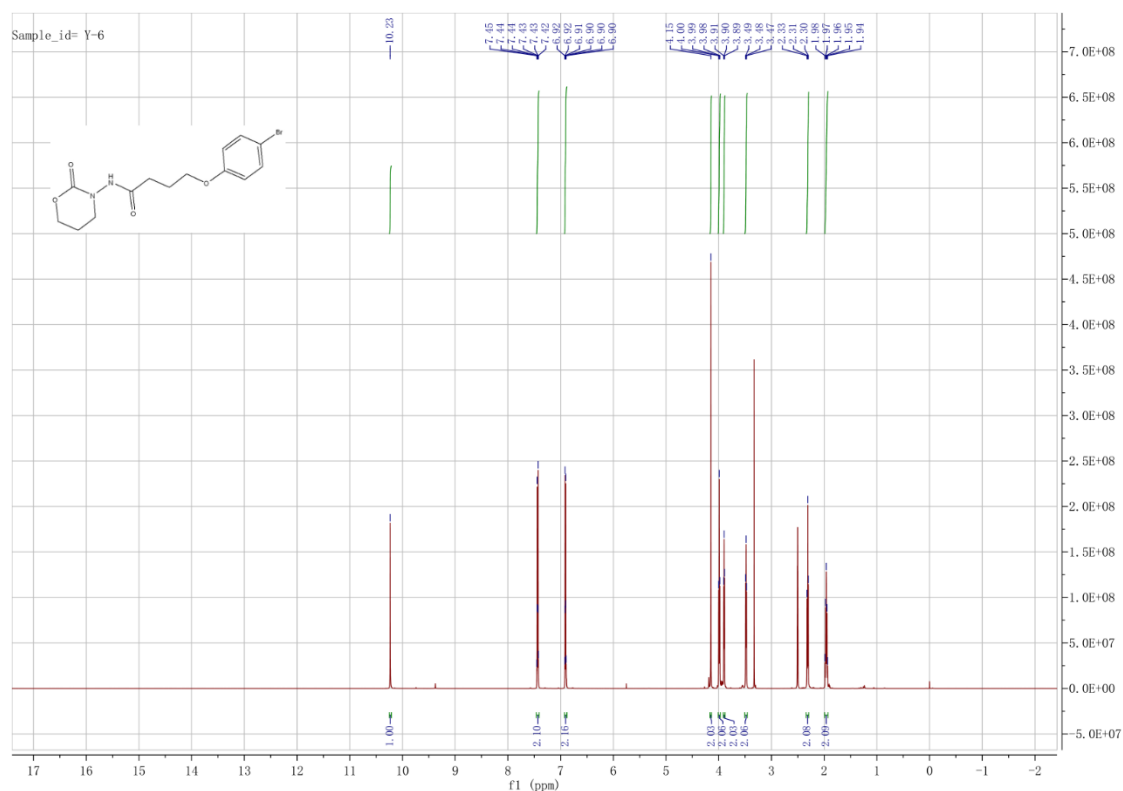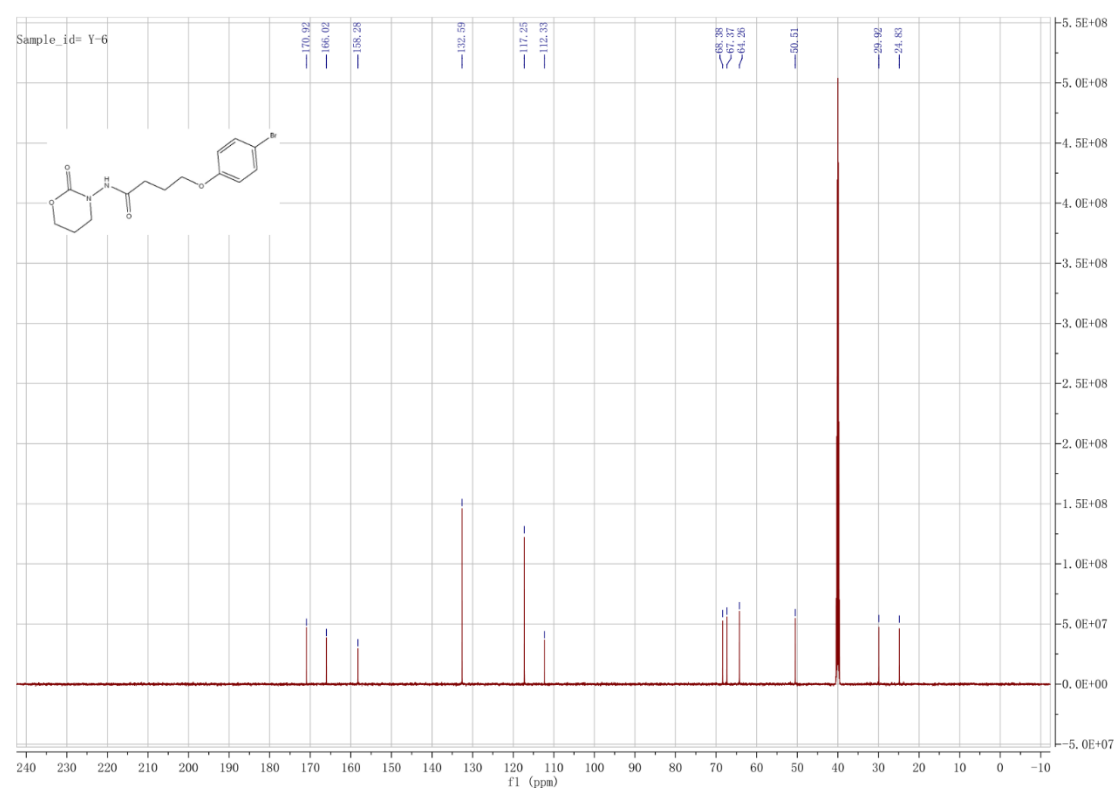

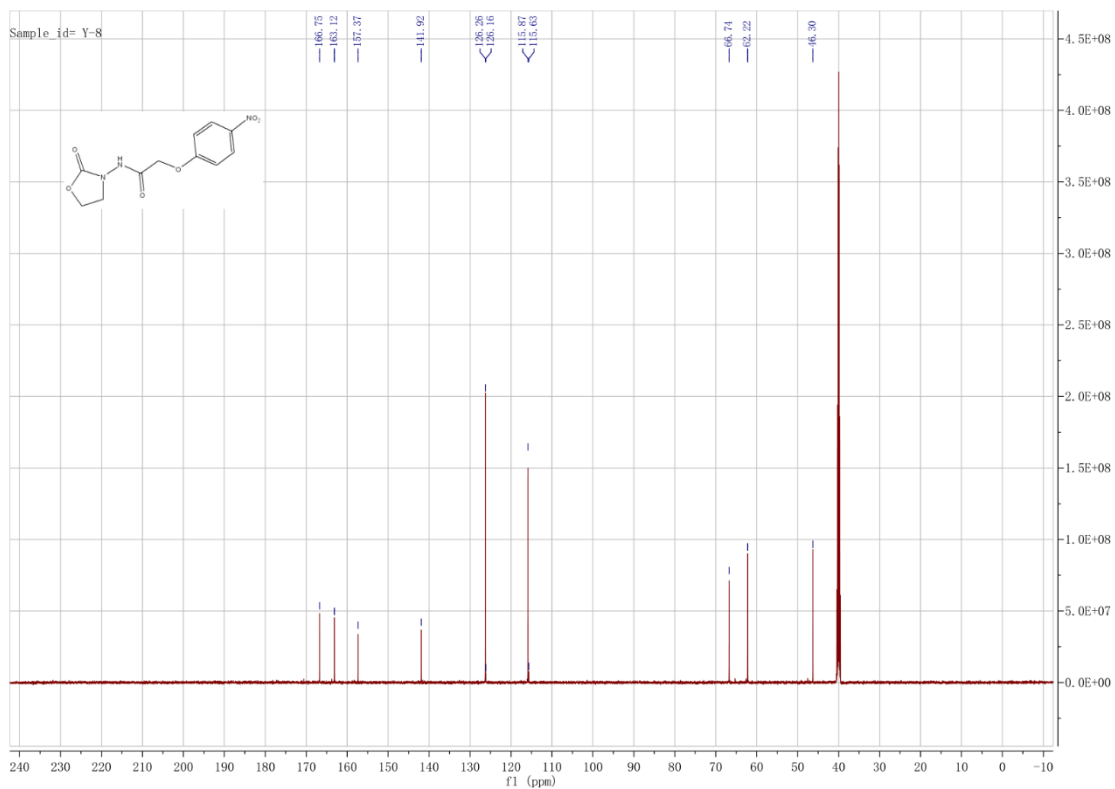

The  $^1\text{H}$ -NMR spectrum of compound Y-8

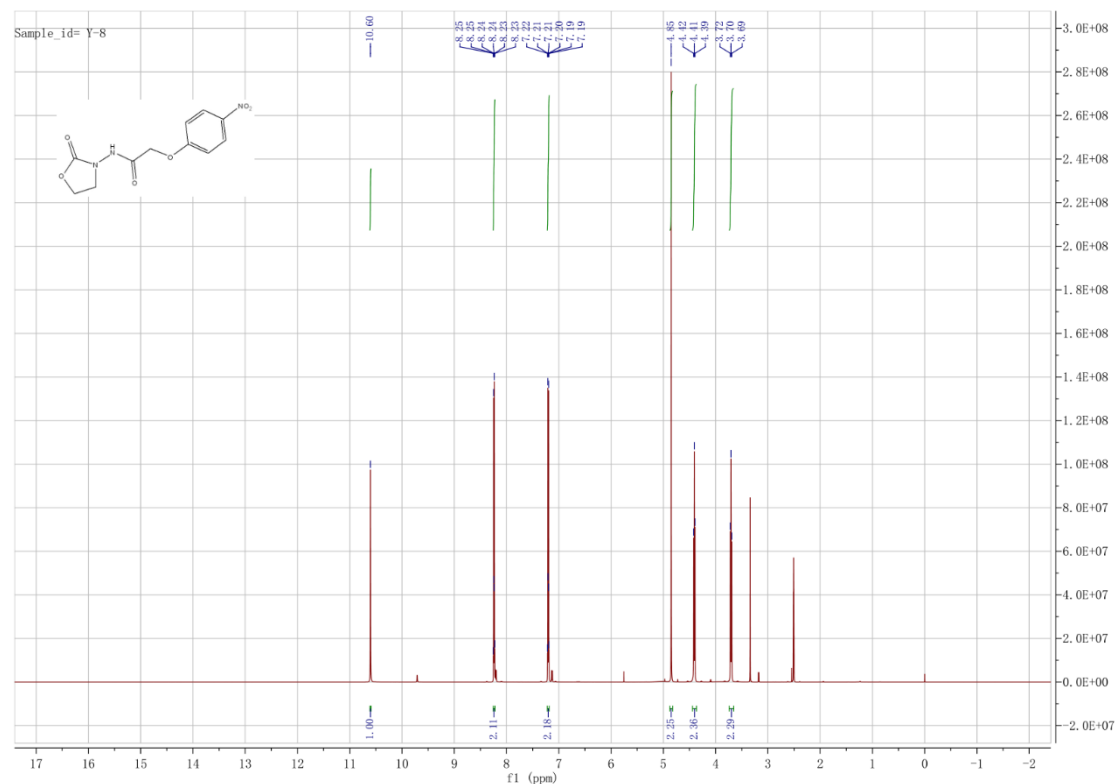

The  $^{13}\text{C}$  NMR spectrum of compound Y-8



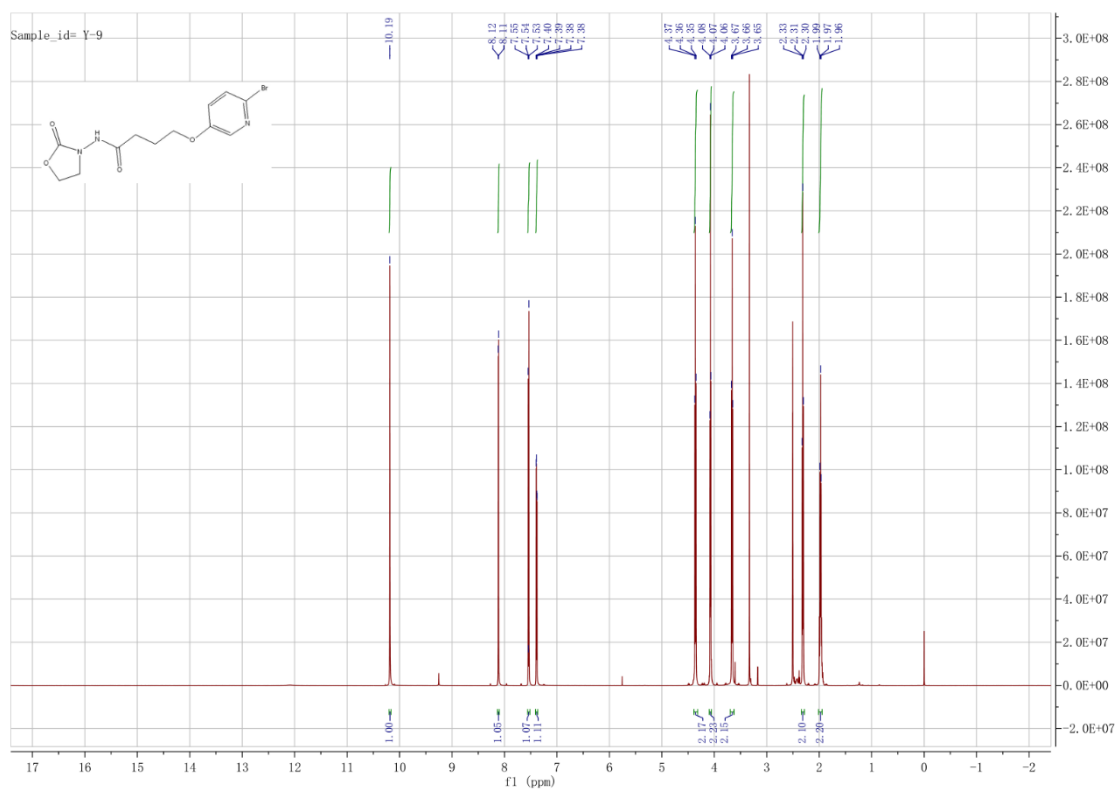

The  $^1\text{H}$ -NMR spectrum of compound Y-9

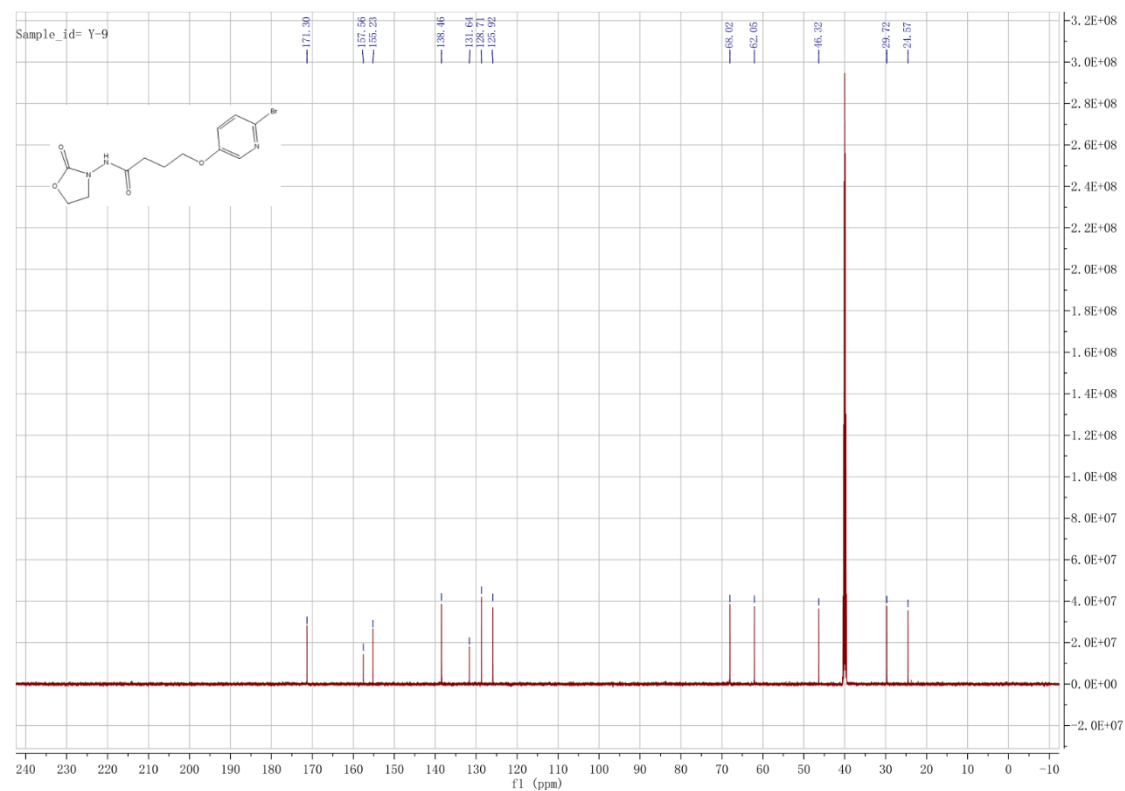

The  $^{13}\text{C}$  NMR spectrum of compound Y-9

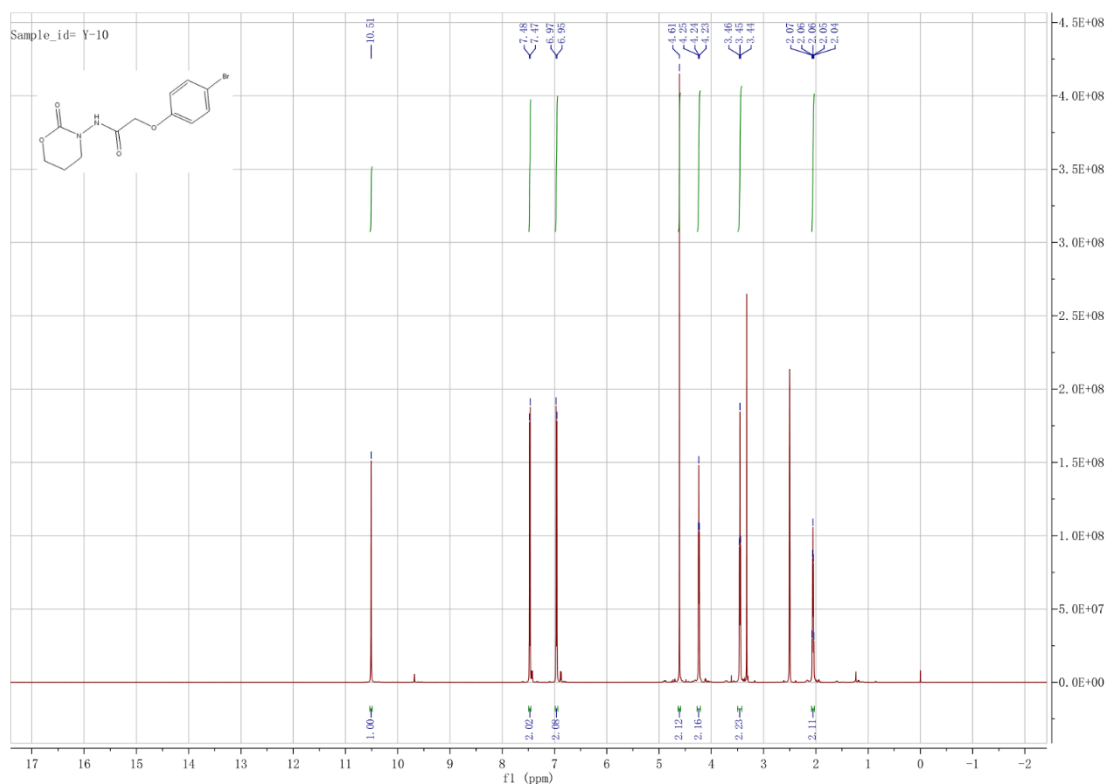

The  $^1\text{H}$ -NMR spectrum of compound Y-10

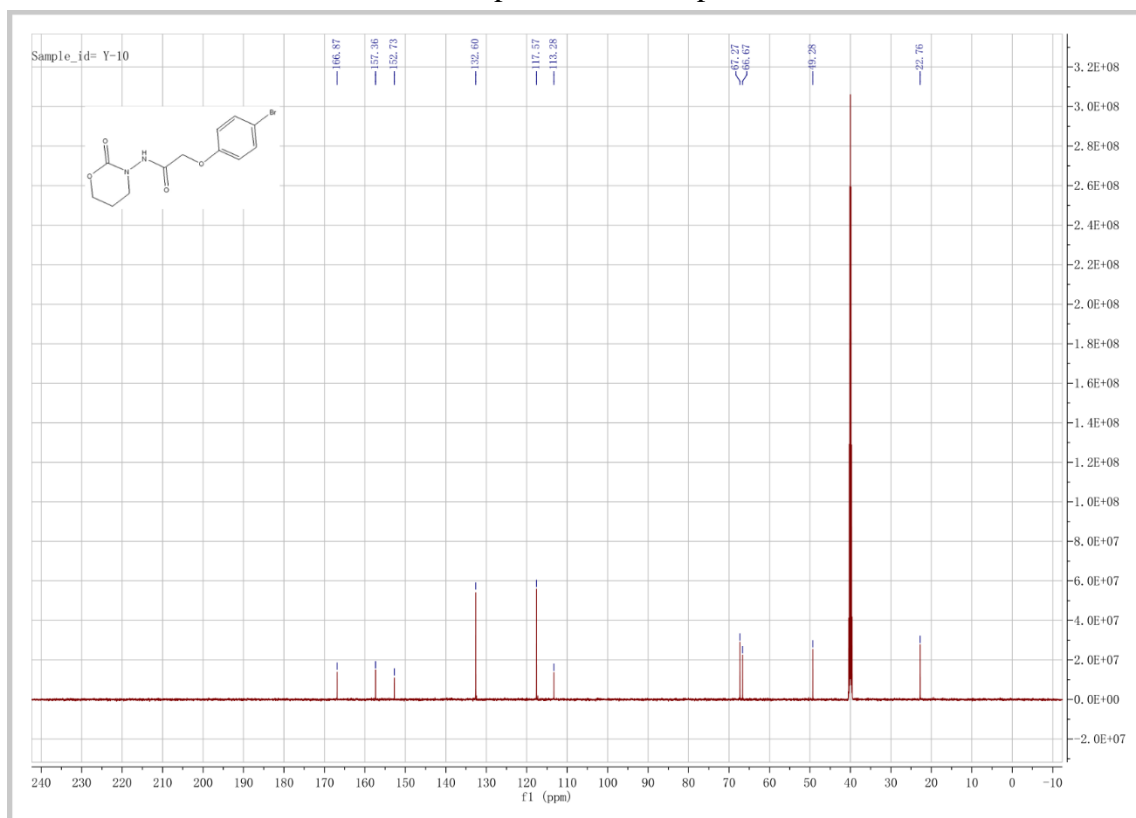

The  $^{13}\text{C}$  NMR spectrum of compound Y-10

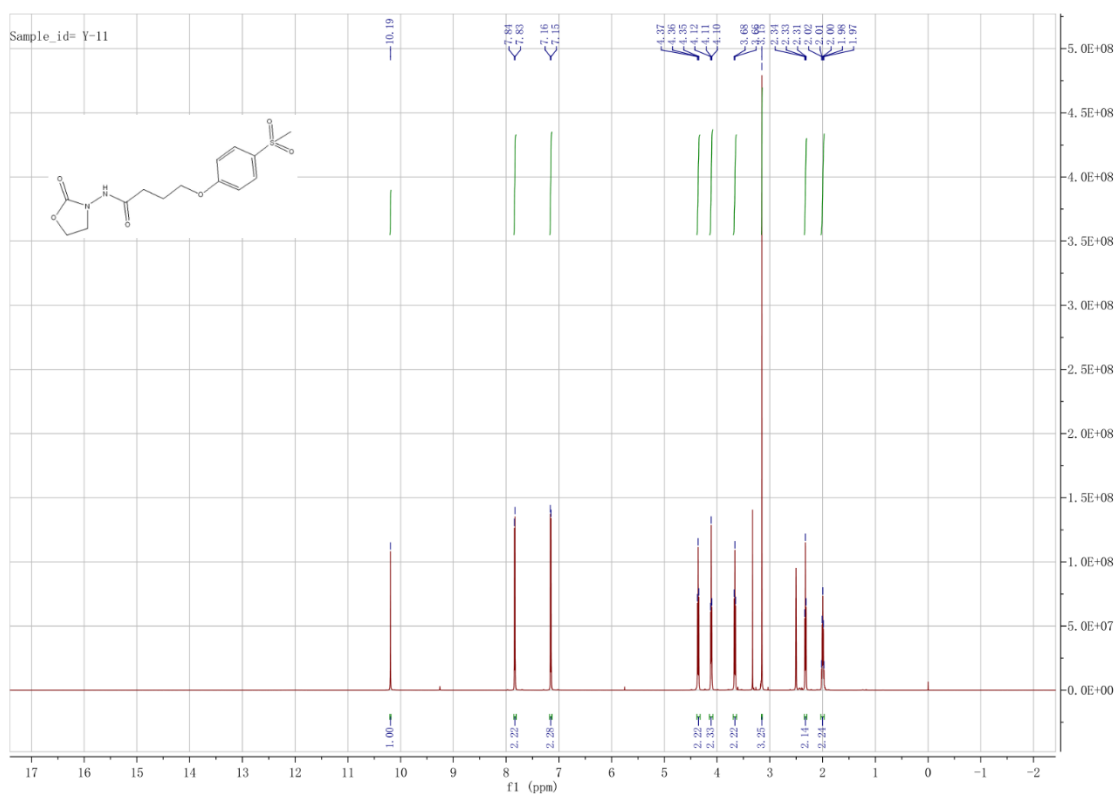

The  $^1\text{H}$ -NMR spectrum of compound Y-11

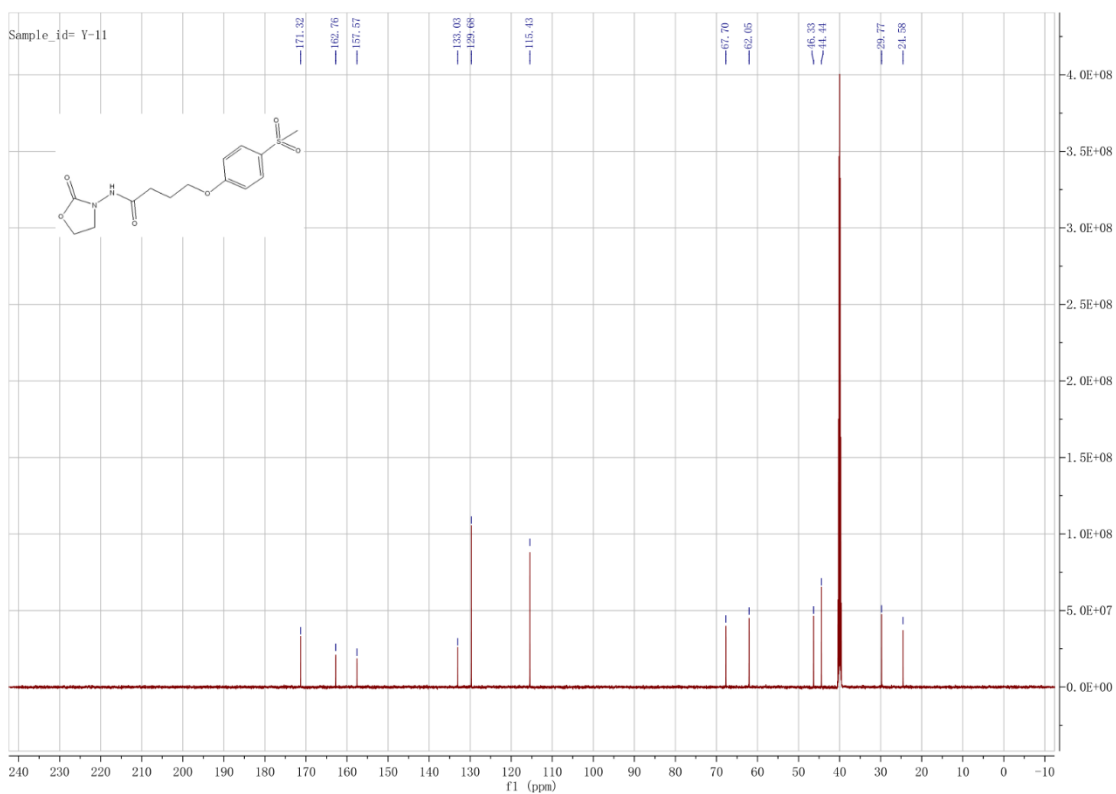

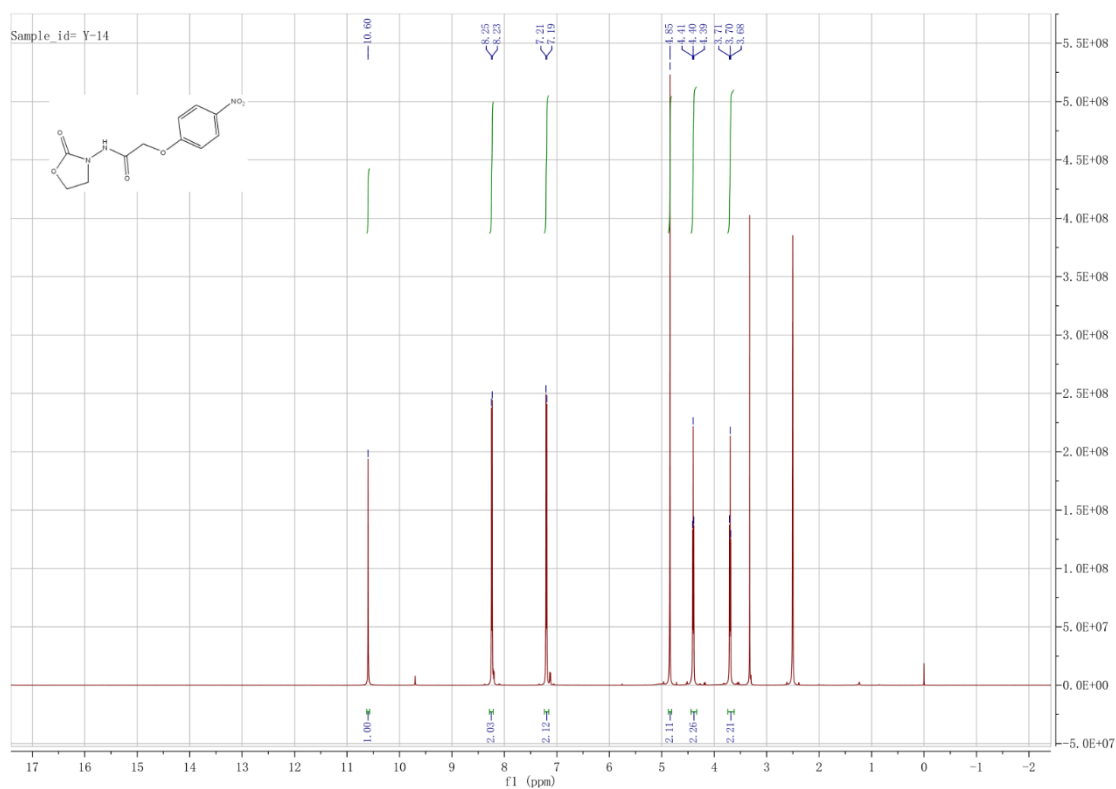

The  $^1\text{H}$ -NMR spectrum of compound Y-14

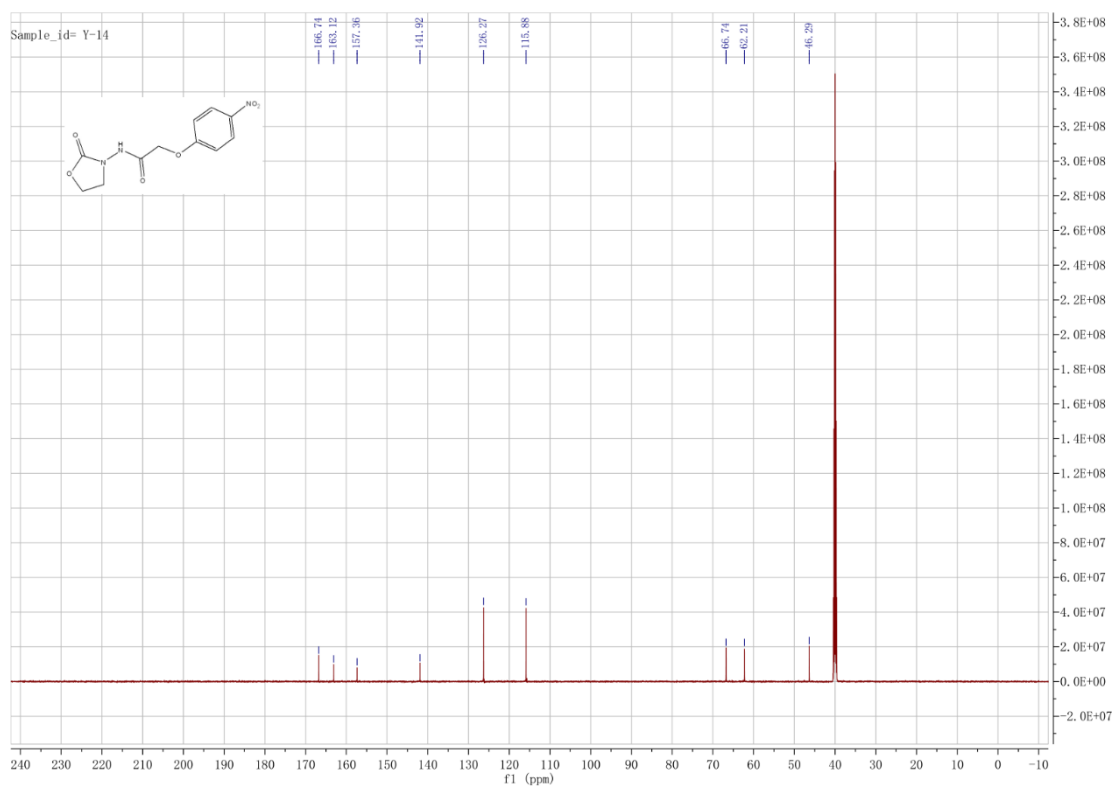

The  $^{13}\text{C}$  NMR spectrum of compound Y-14

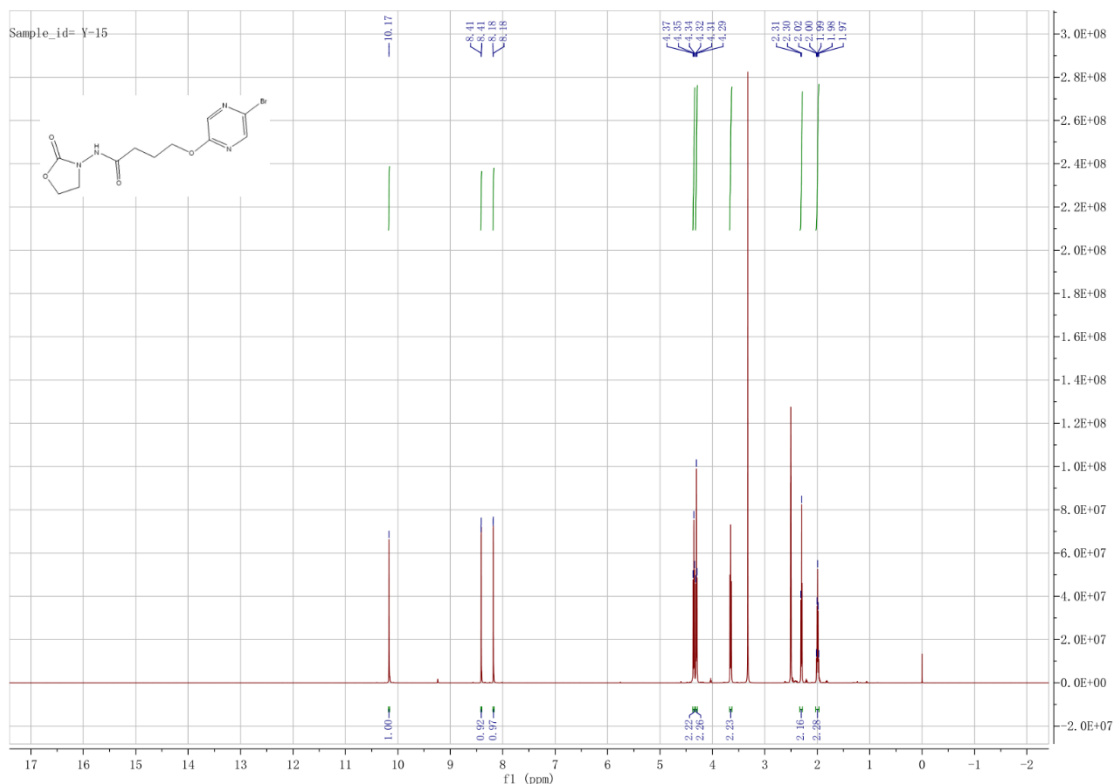

The  $^1\text{H}$ -NMR spectrum of compound Y-15

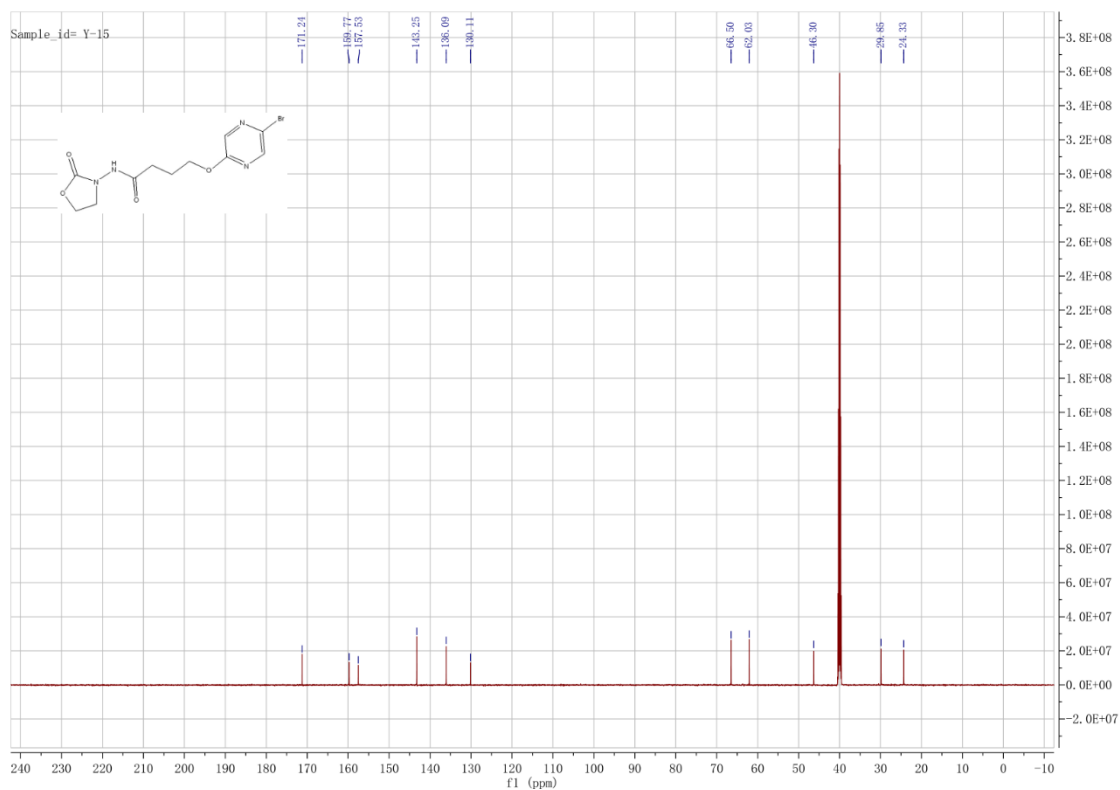

The  $^{13}\text{C}$  NMR spectrum of compound Y-15

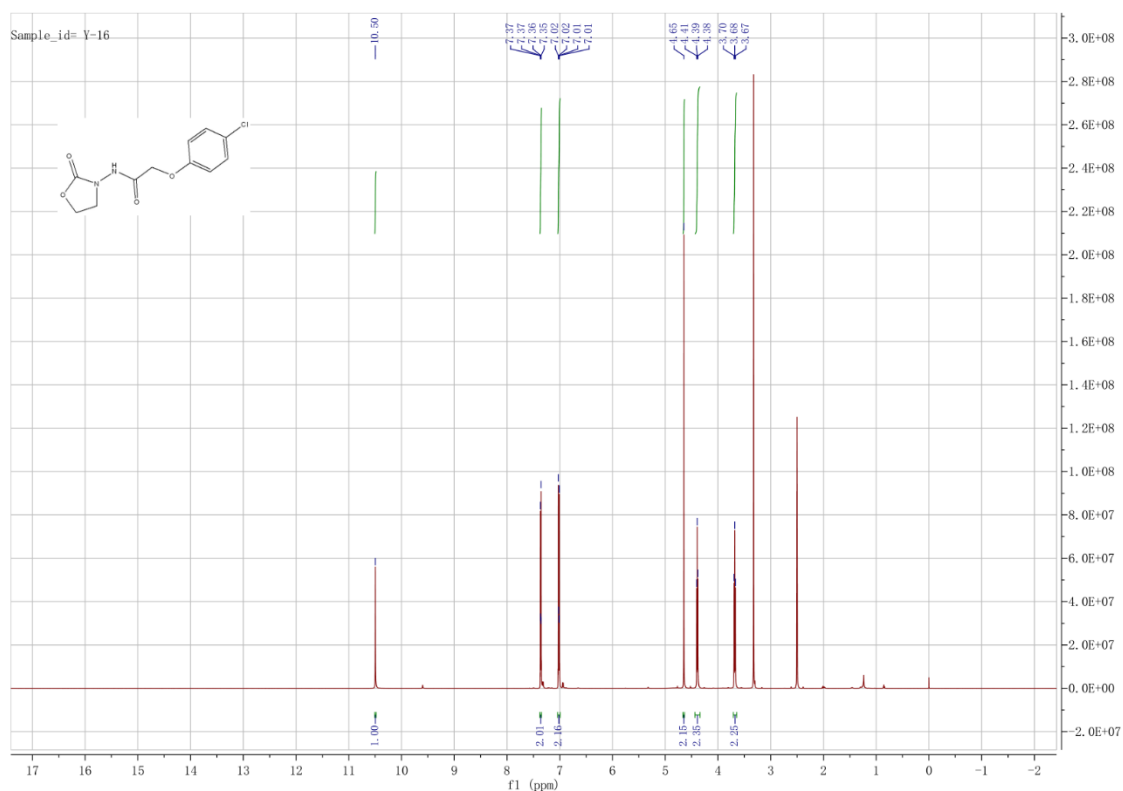

The  $^1\text{H}$ -NMR spectrum of compound Y-16

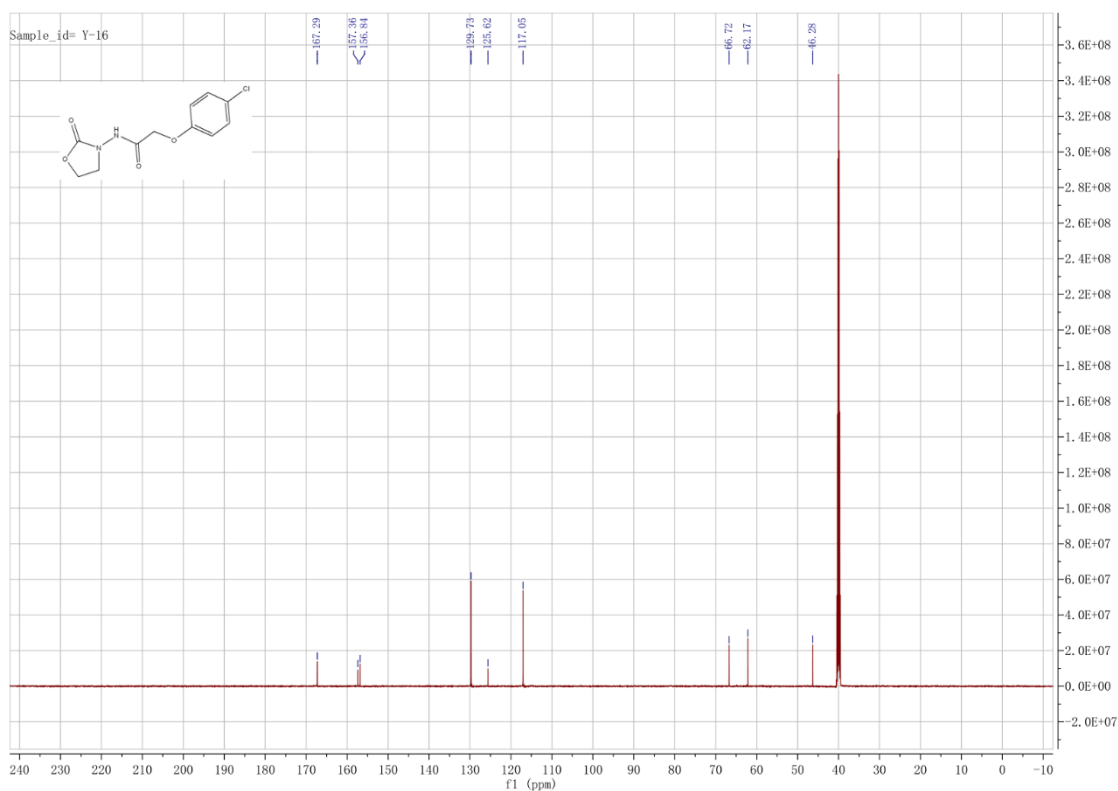

The  $^{13}\text{C}$  NMR spectrum of compound Y-16

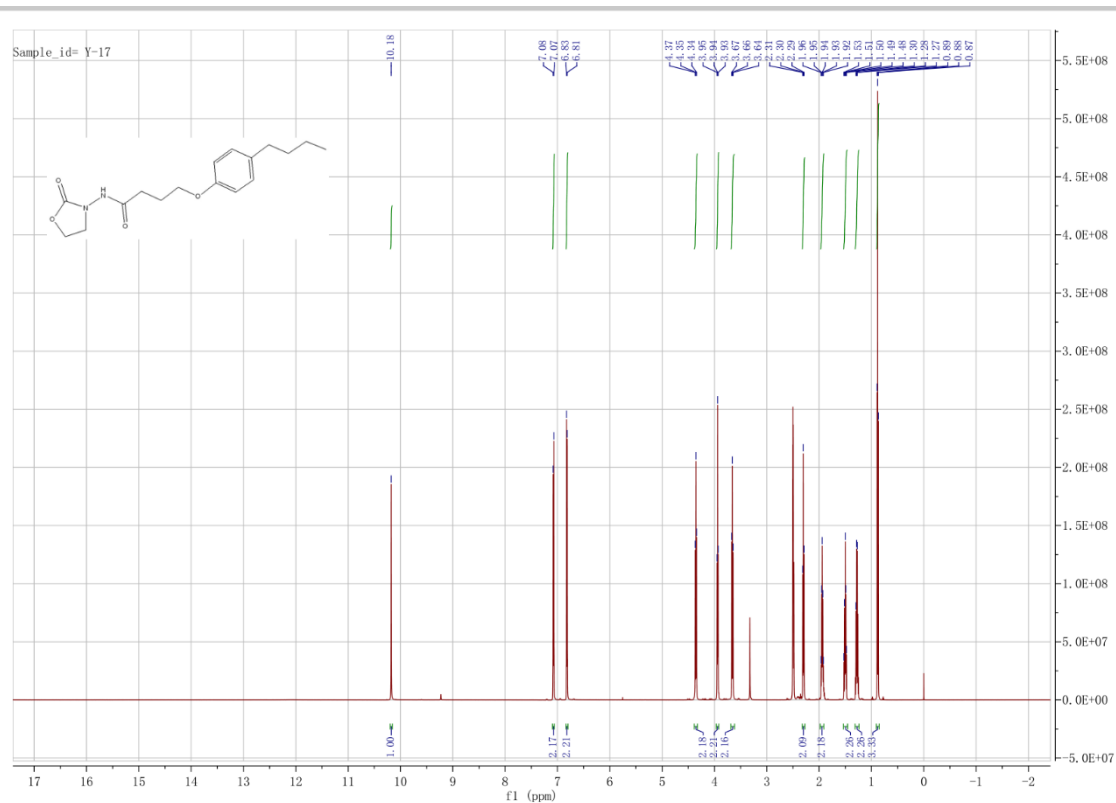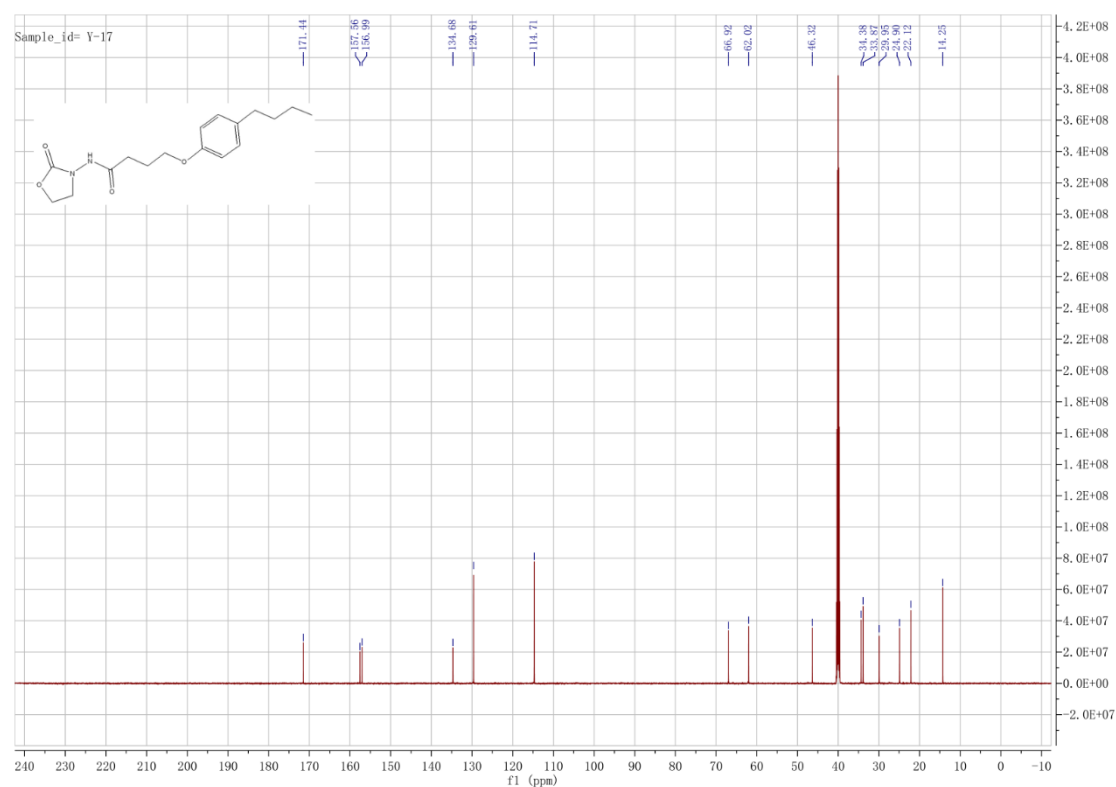

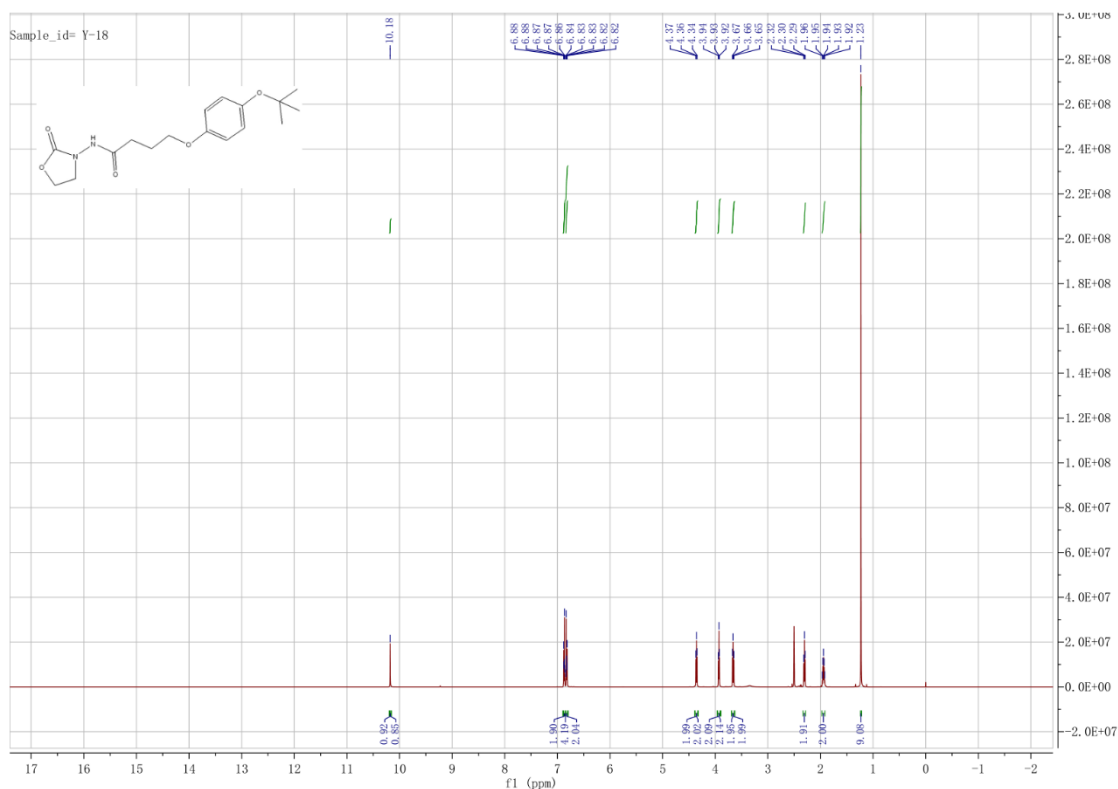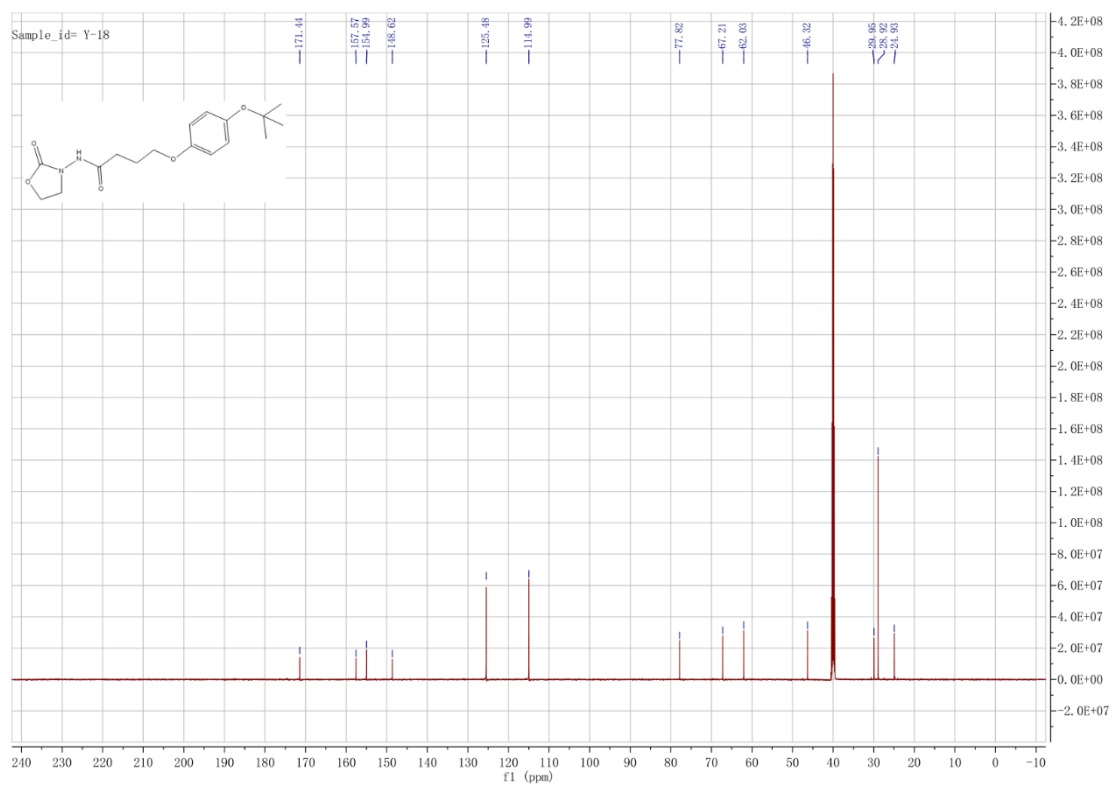



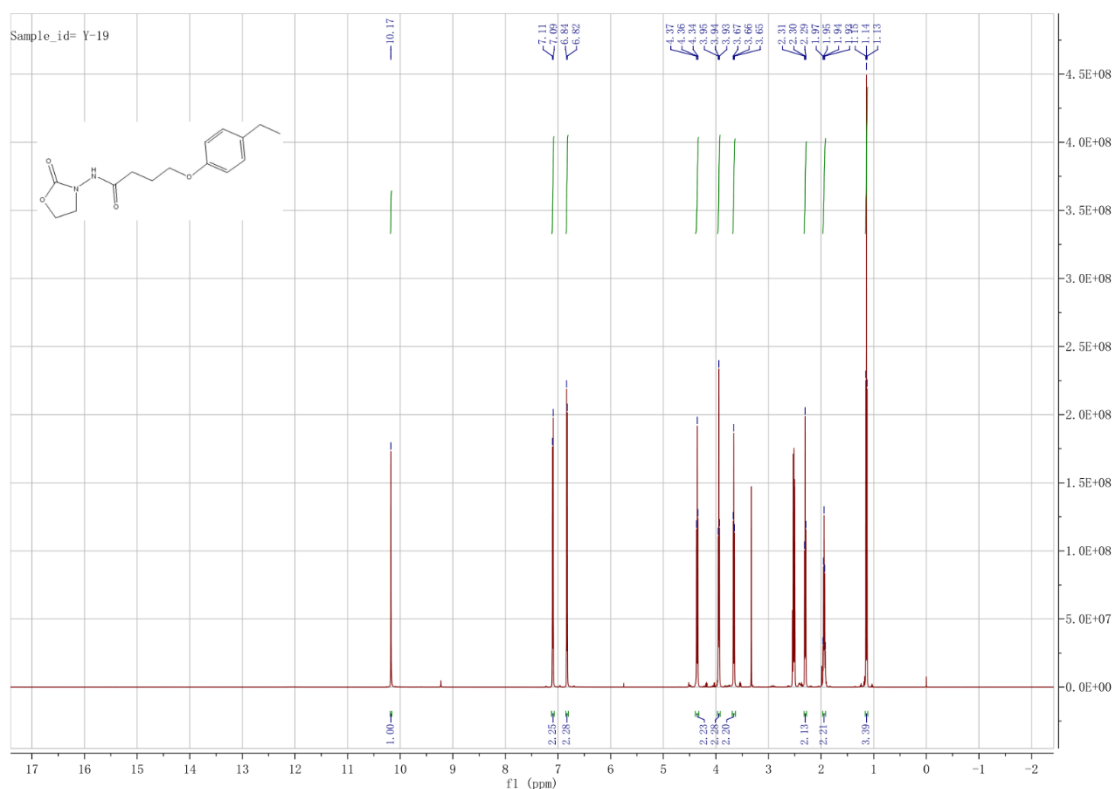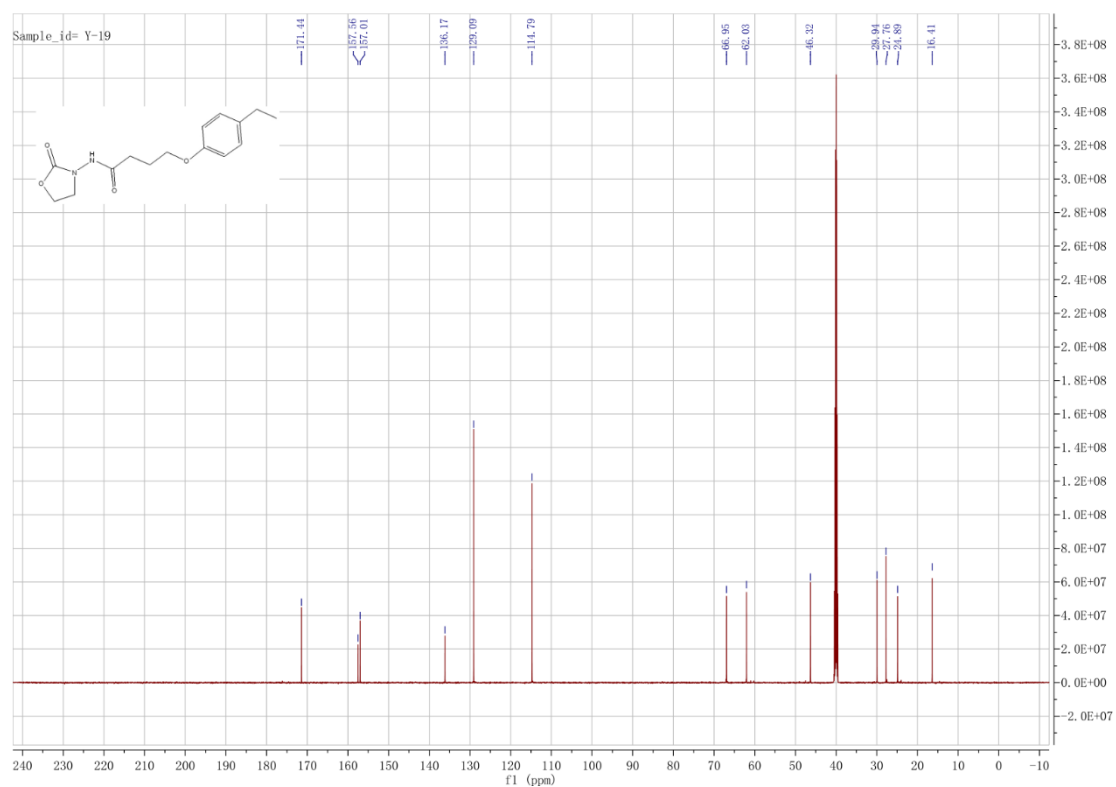

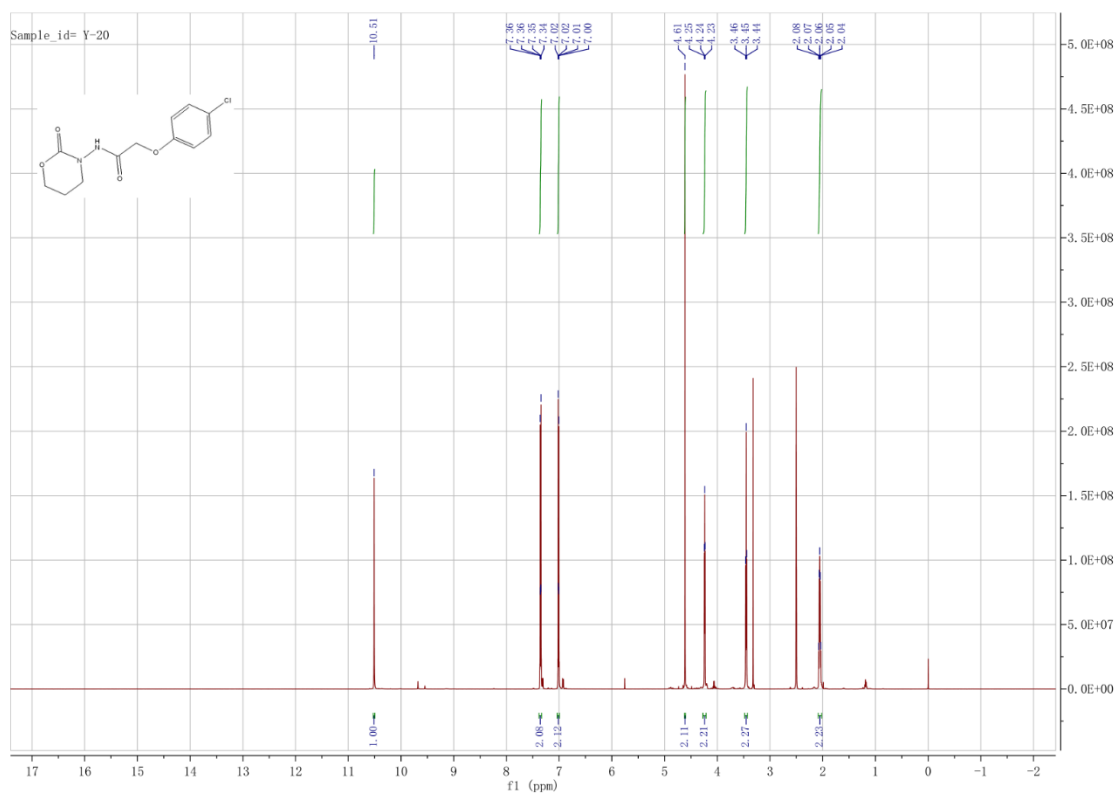

The  $^1\text{H}$ -NMR spectrum of compound Y-20

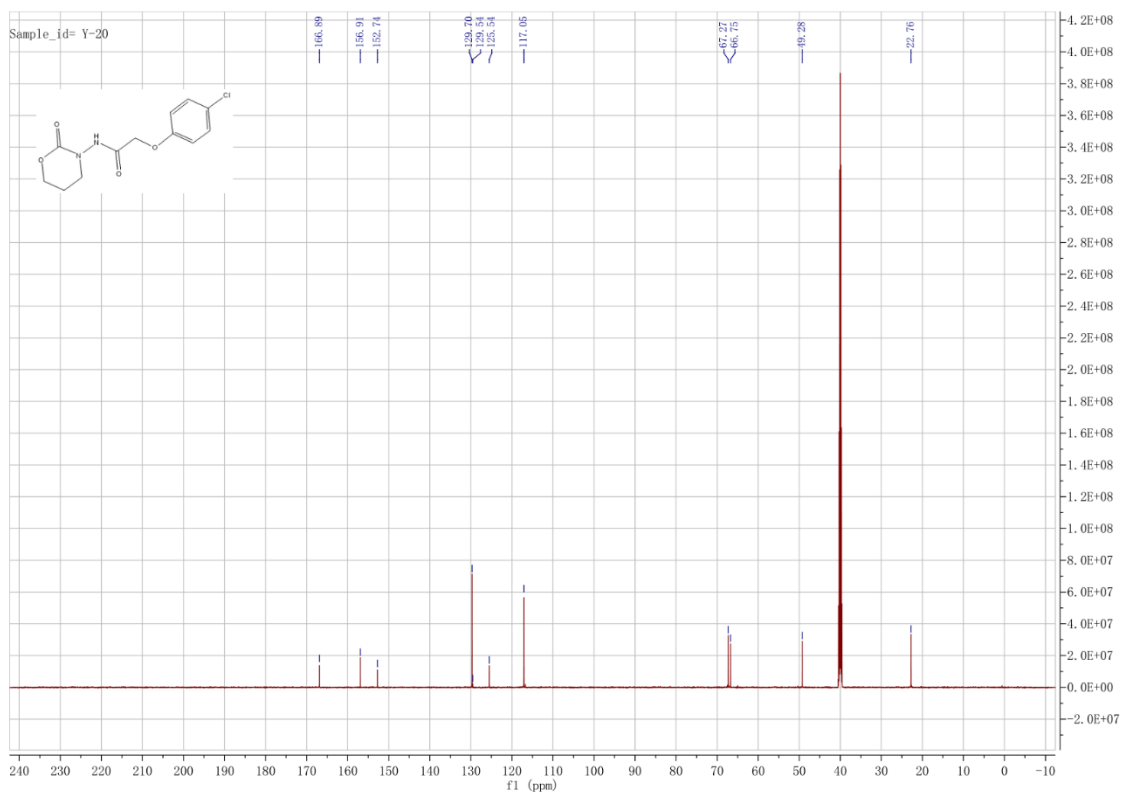

The  $^{13}\text{C}$  NMR spectrum of compound Y-20

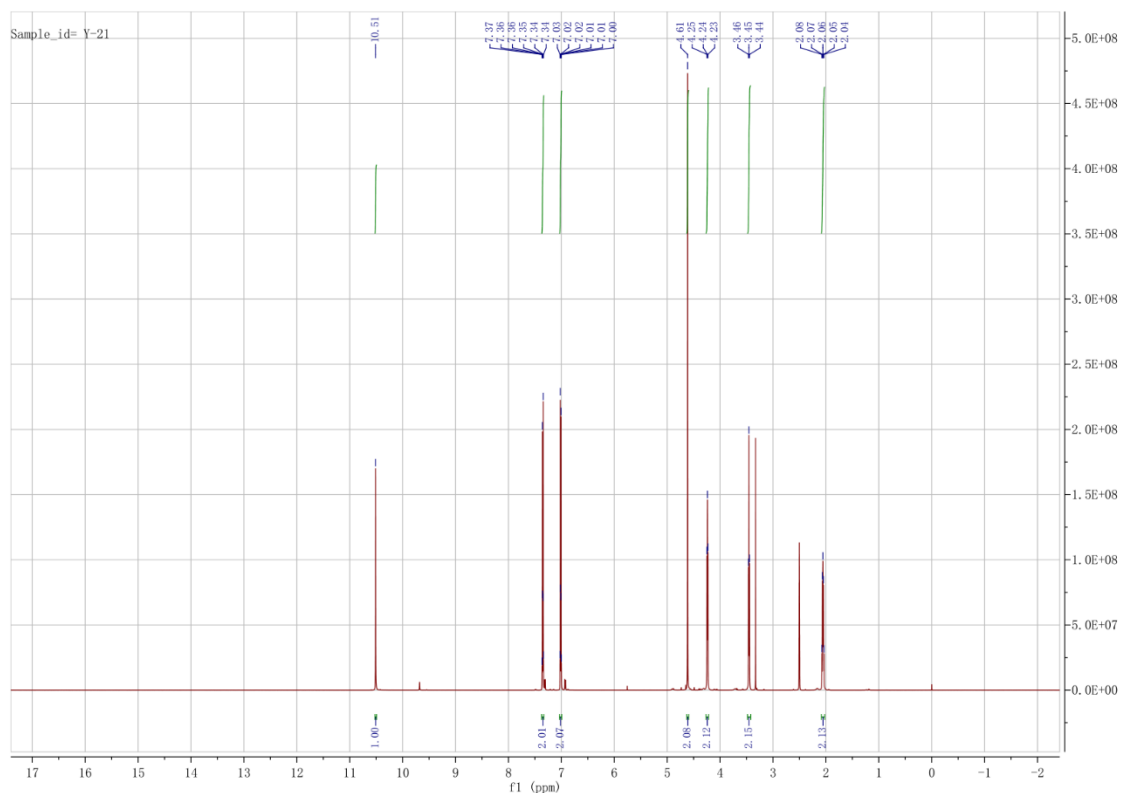

The  $^1\text{H}$ -NMR spectrum of compound Y-21

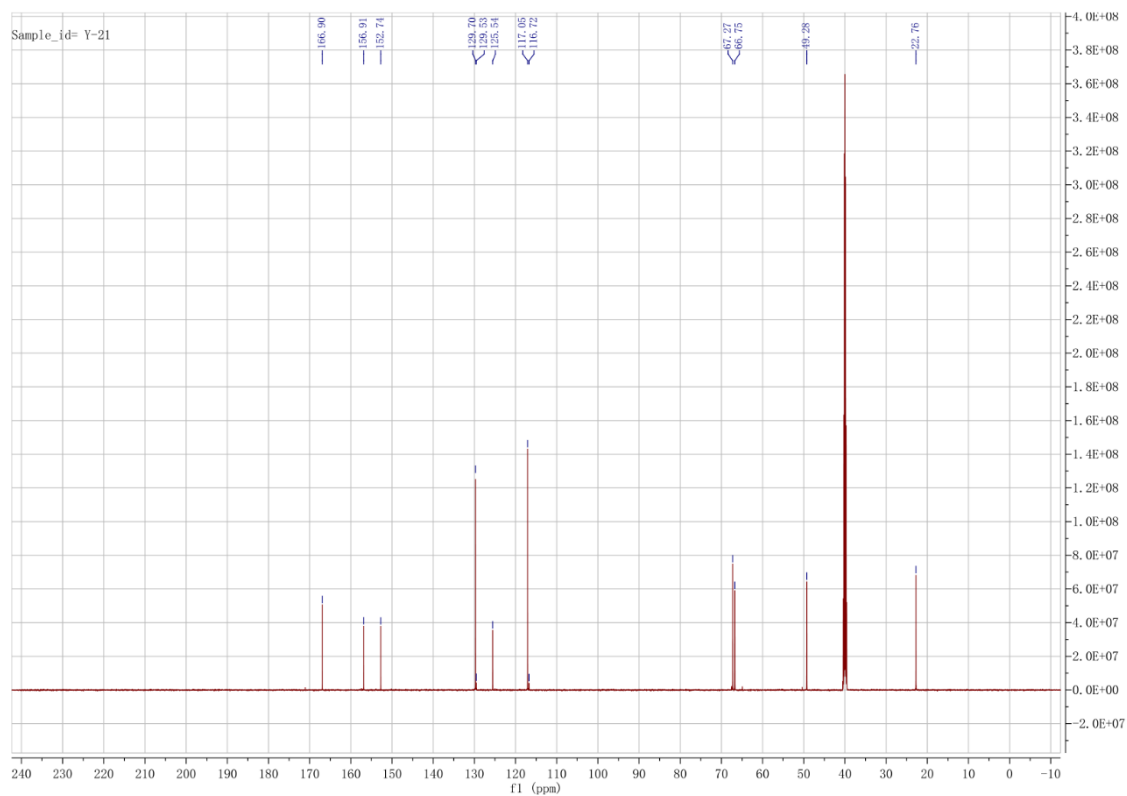

The  $^{13}\text{C}$  NMR spectrum of compound Y-21

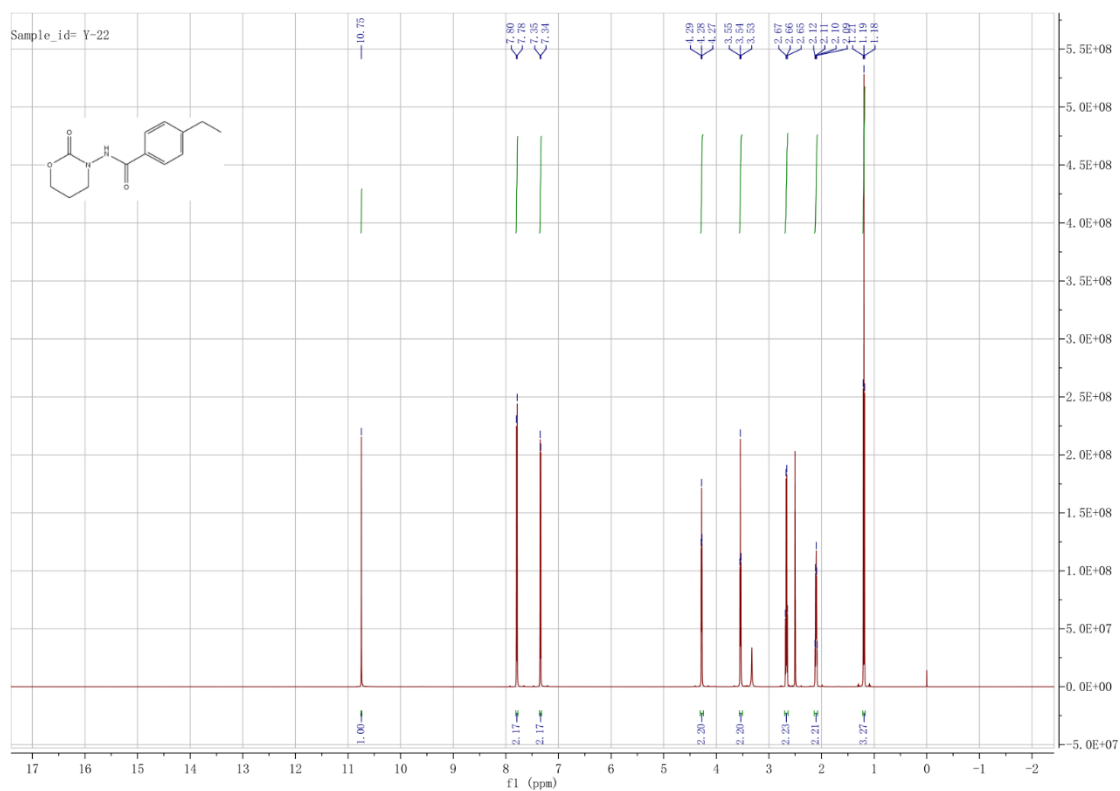

The  $^1\text{H}$ -NMR spectrum of compound Y-22

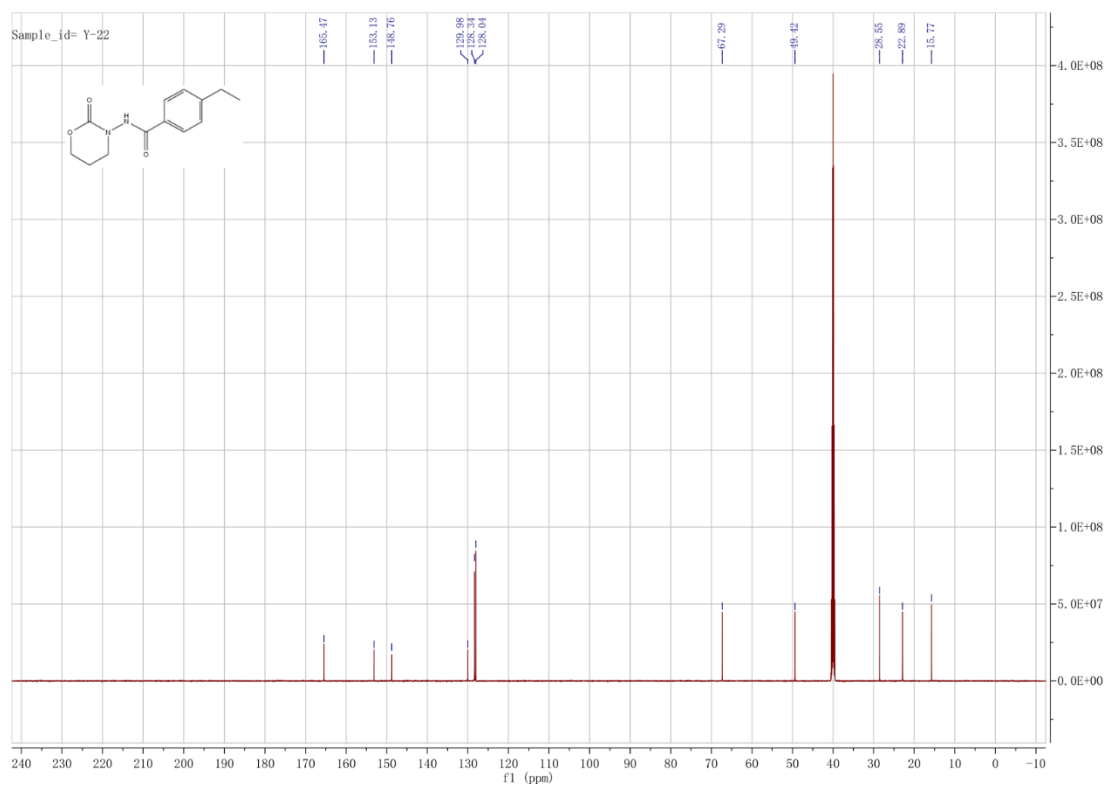

The  $^{13}\text{C}$  NMR spectrum of compound Y-22

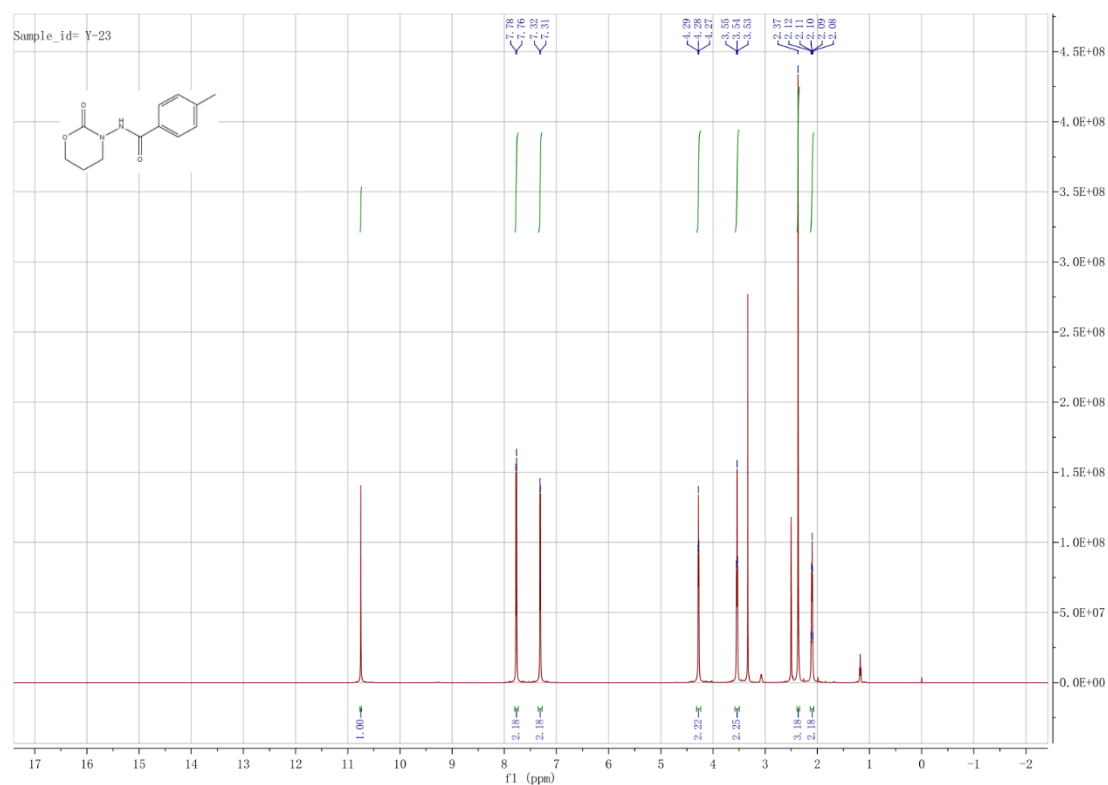

The  $^1\text{H}$ -NMR spectrum of compound Y-23

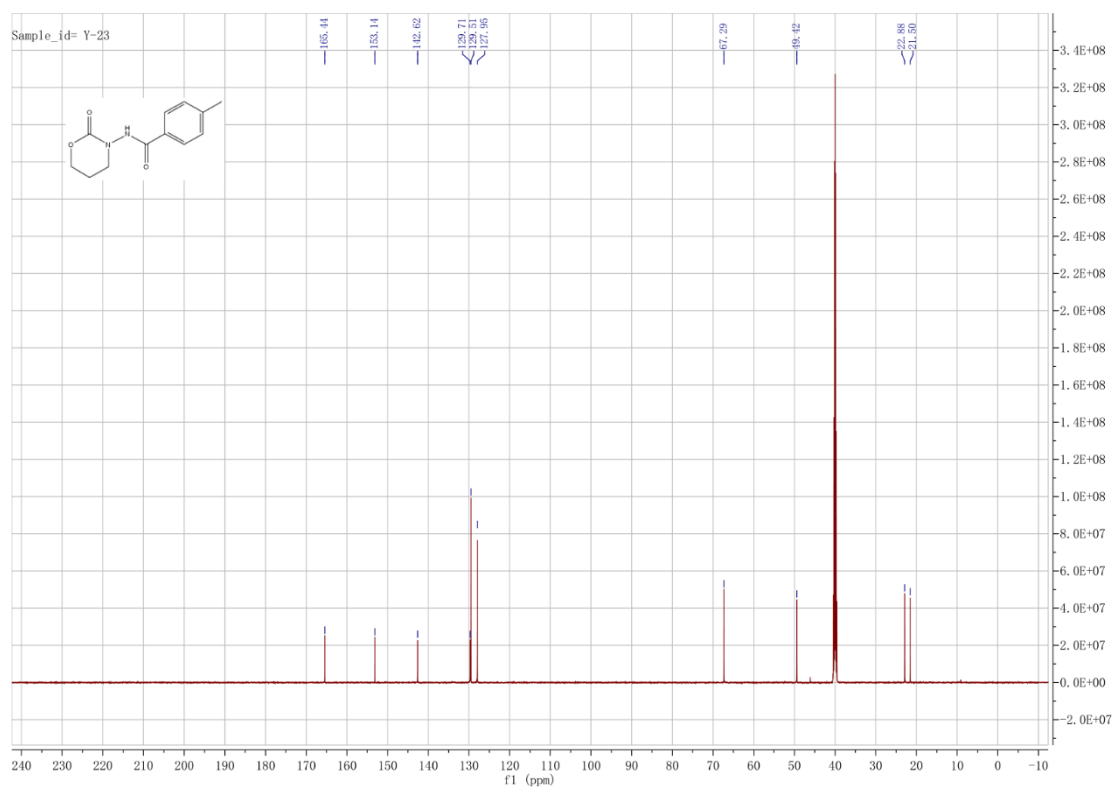

The  $^{13}\text{C}$  NMR spectrum of compound Y-23

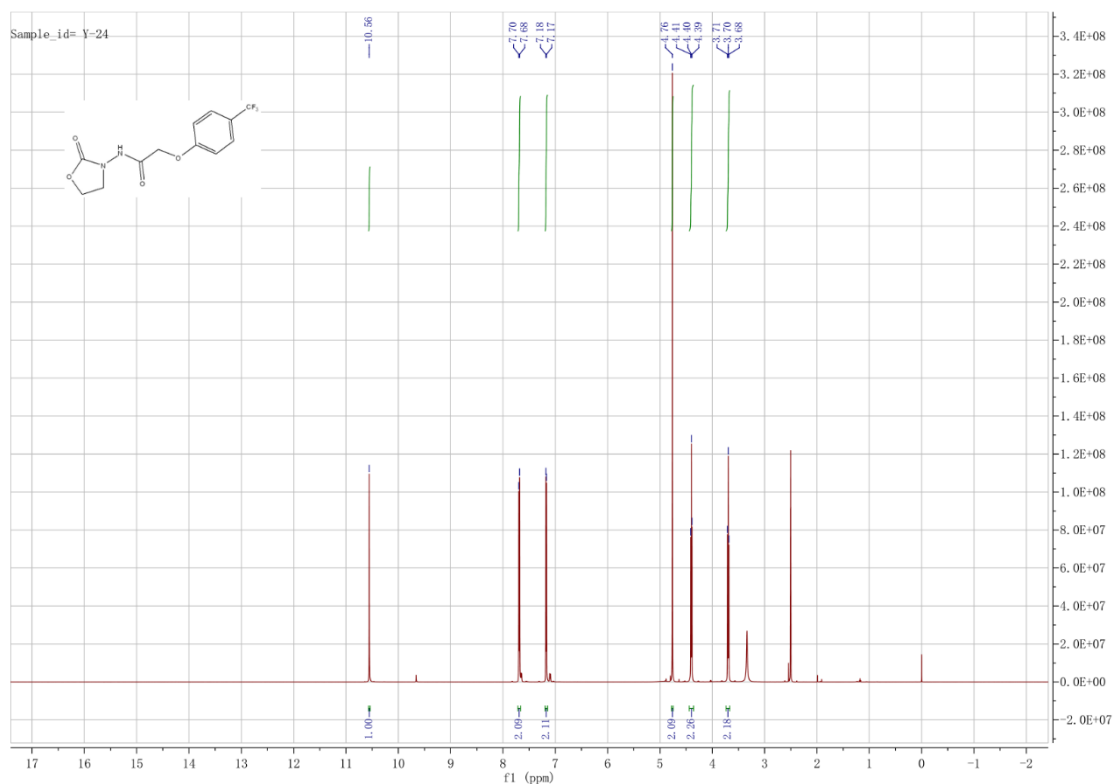

The  $^1\text{H}$ -NMR spectrum of compound Y-24

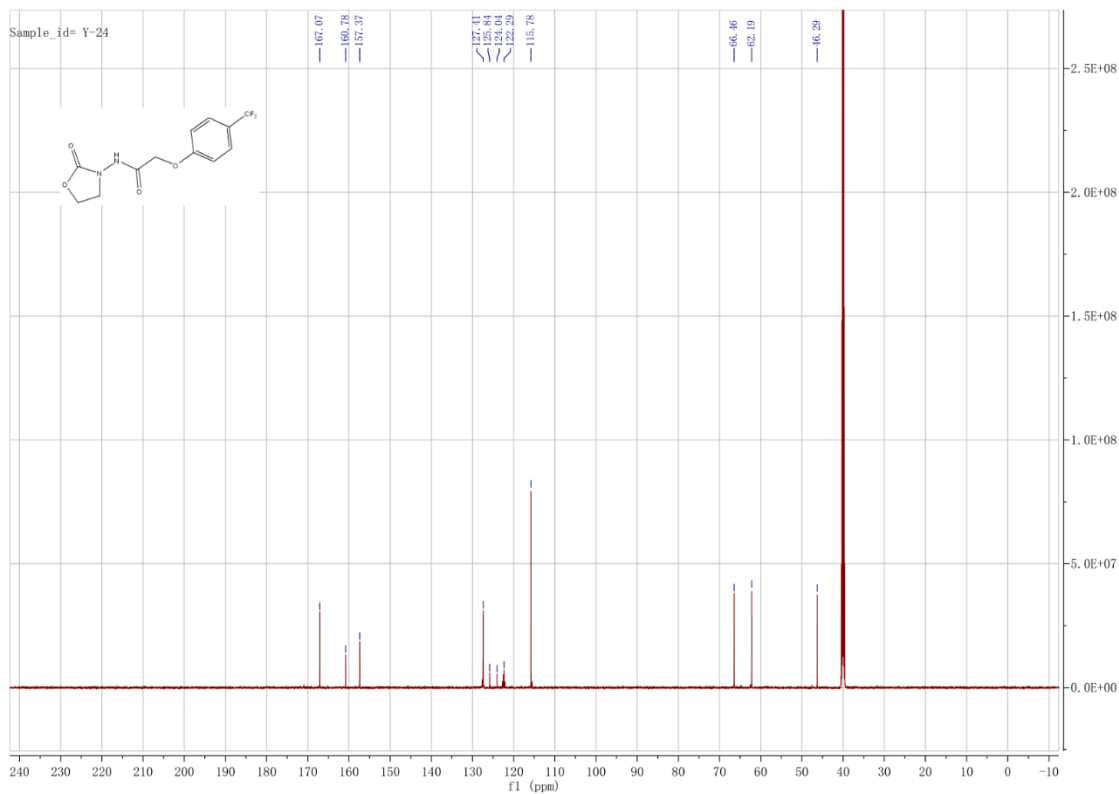

The  $^{13}\text{C}$  NMR spectrum of compound Y-24

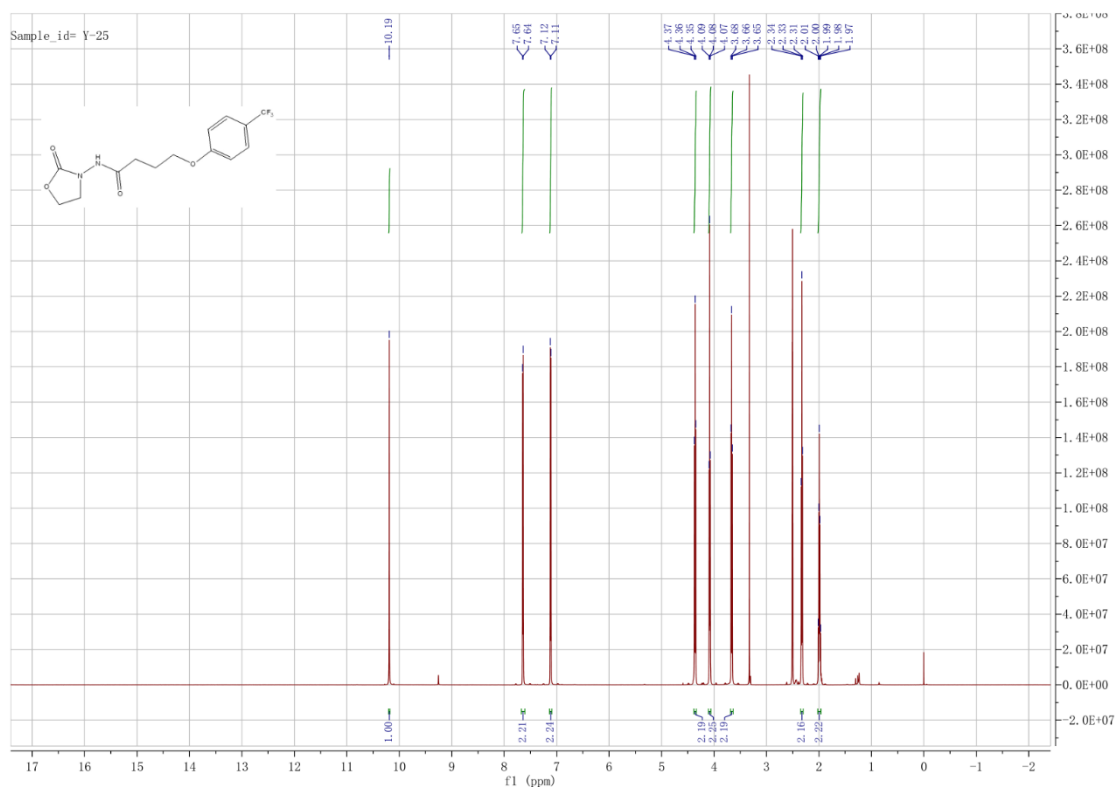

The  $^1\text{H}$ -NMR spectrum of compound Y-25

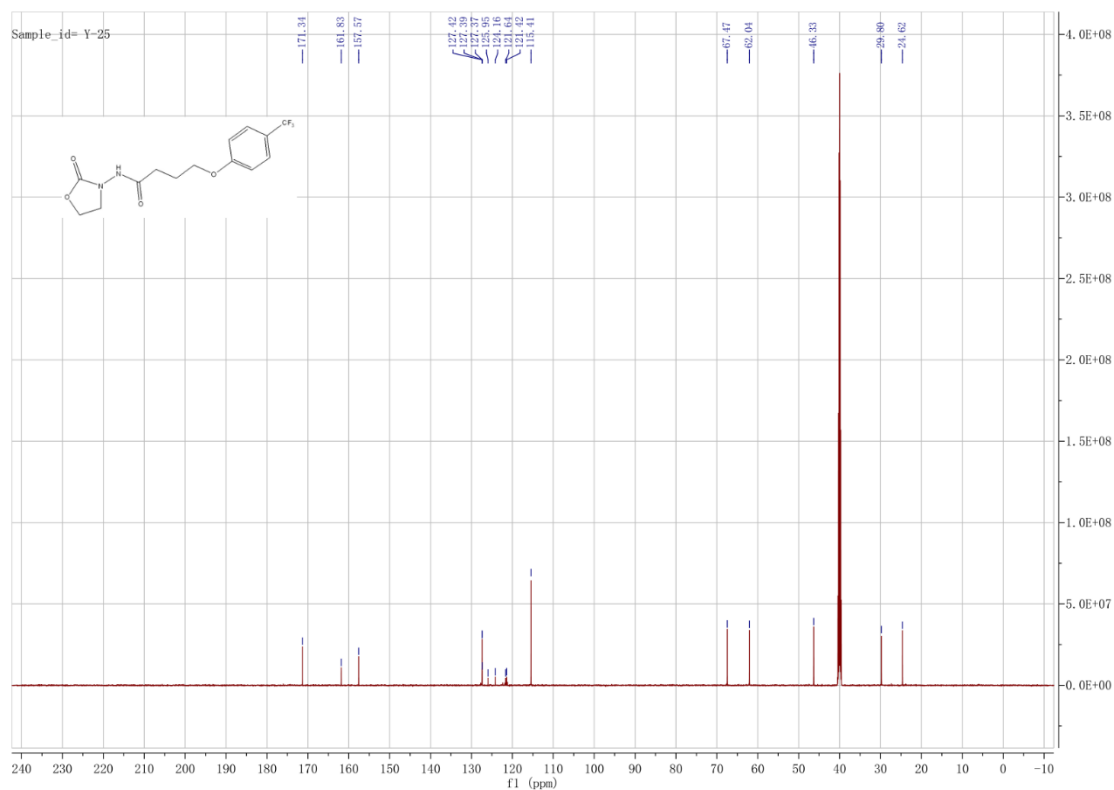

The  $^{13}\text{C}$  NMR spectrum of compound Y-25

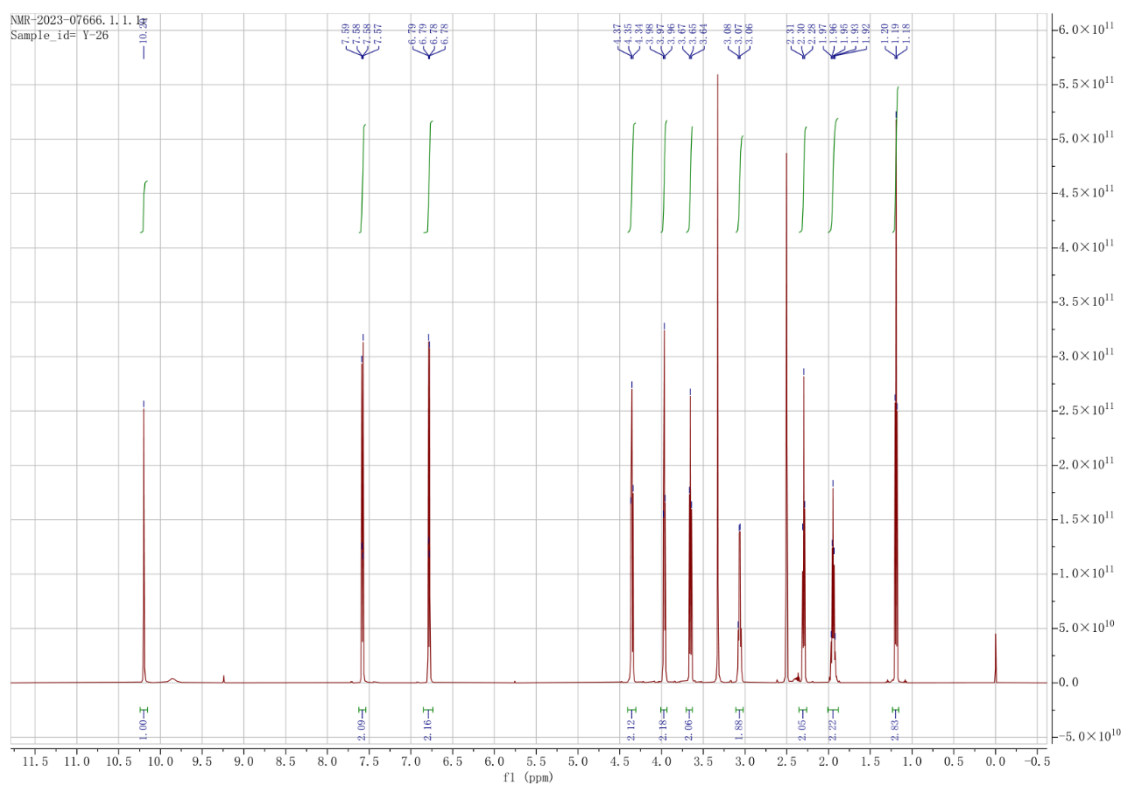

The  $^1\text{H}$ -NMR spectrum of compound Y-26

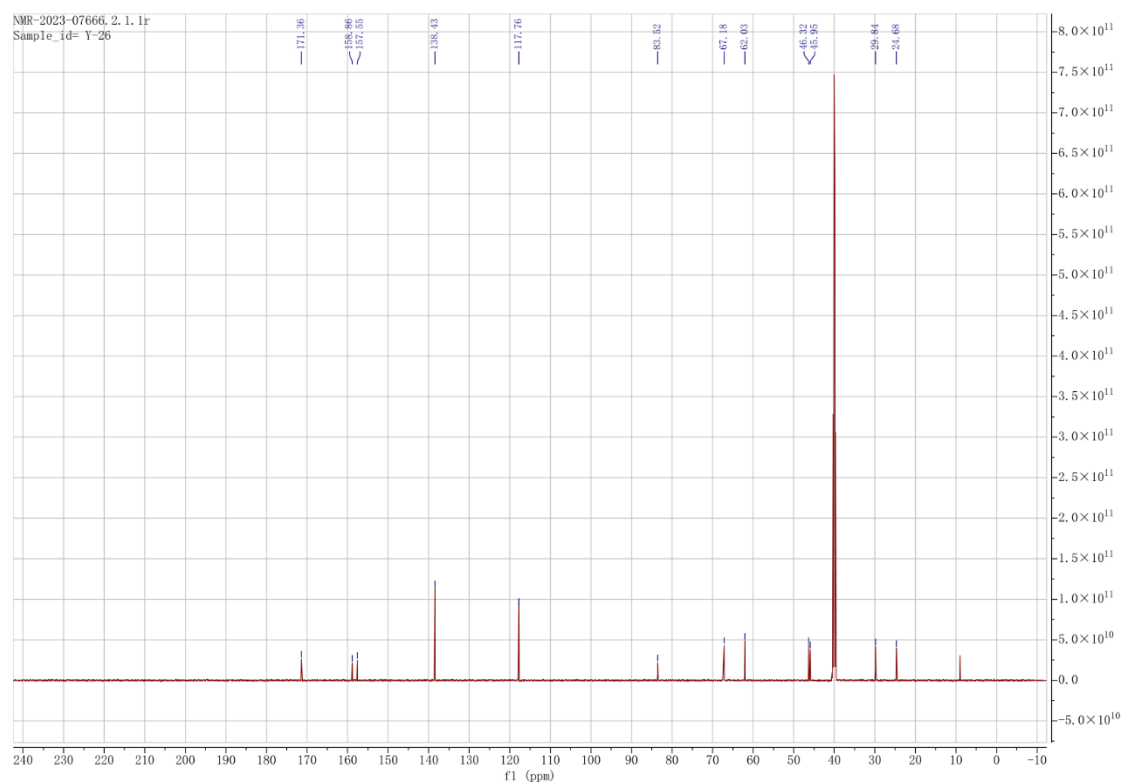

The  $^{13}\text{C}$  NMR spectrum of compound Y-26



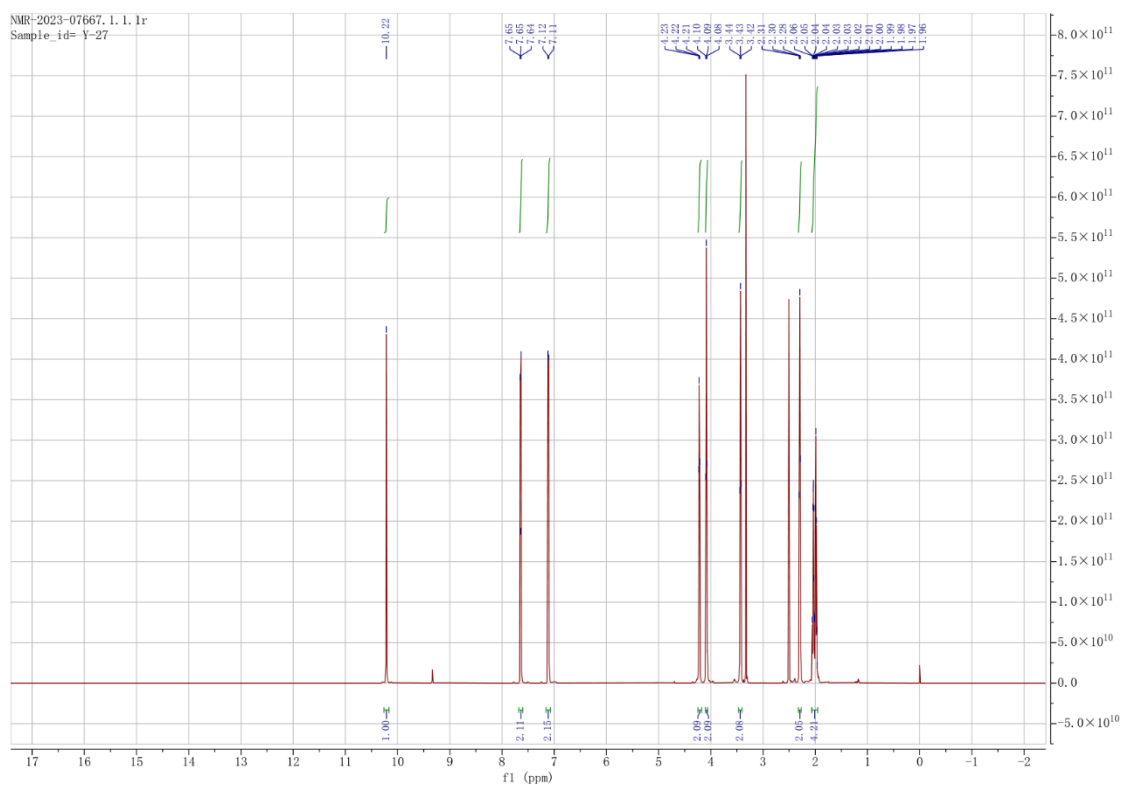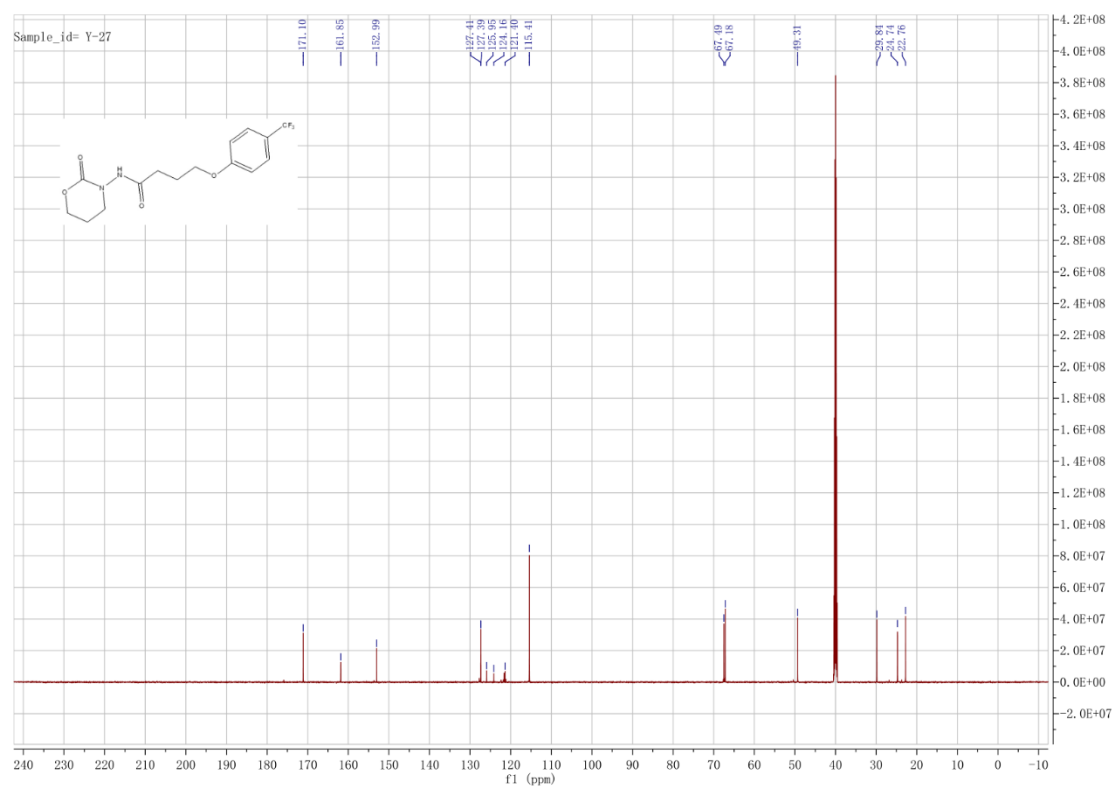

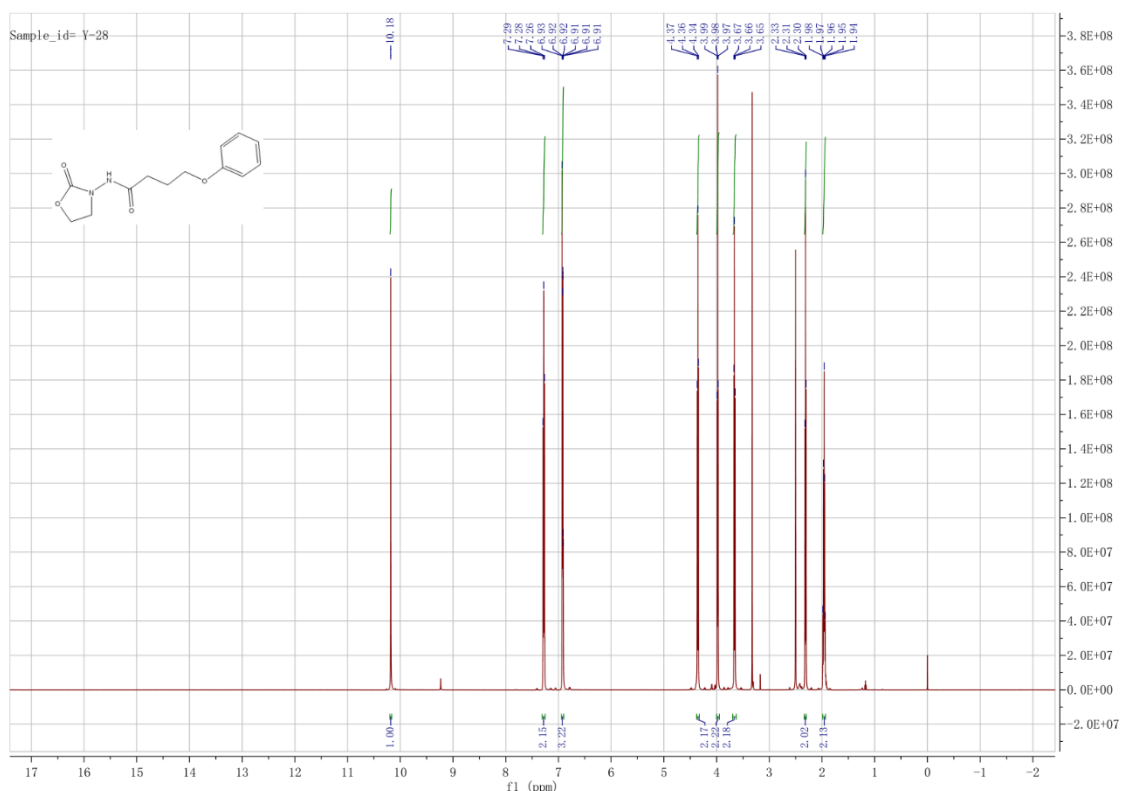

The  $^1\text{H}$ -NMR spectrum of compound Y-28

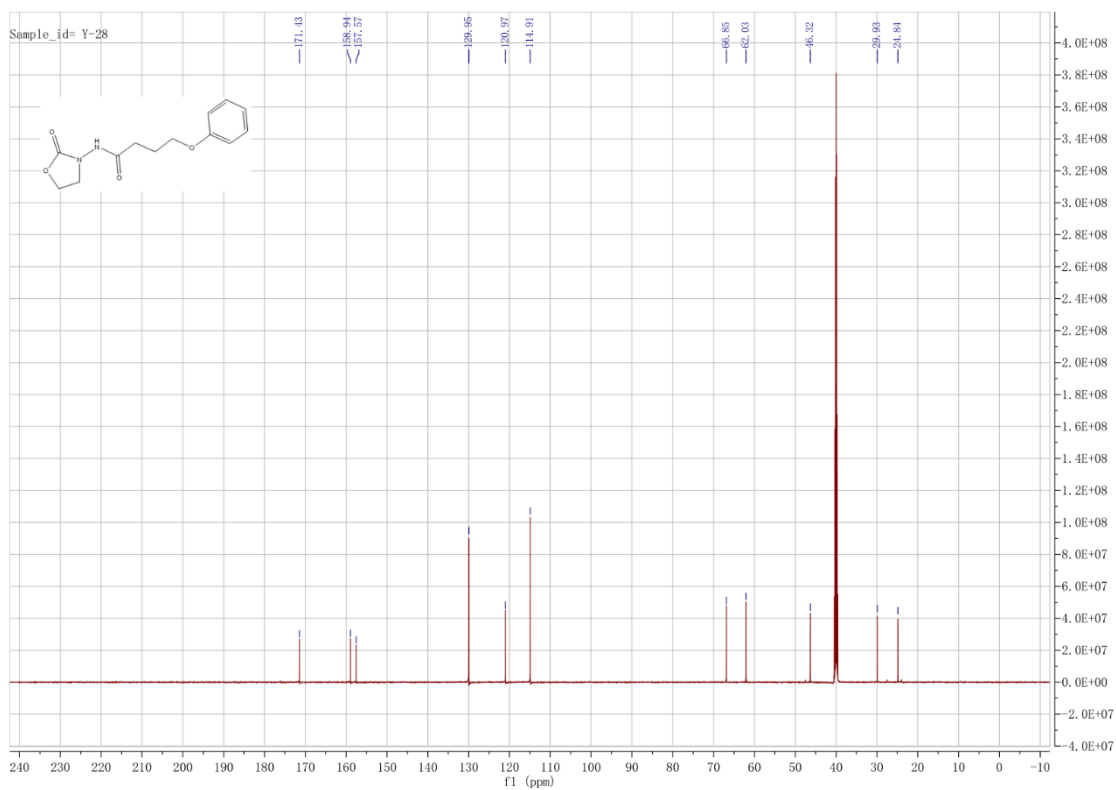

The  $^{13}\text{C}$  NMR spectrum of compound Y-28

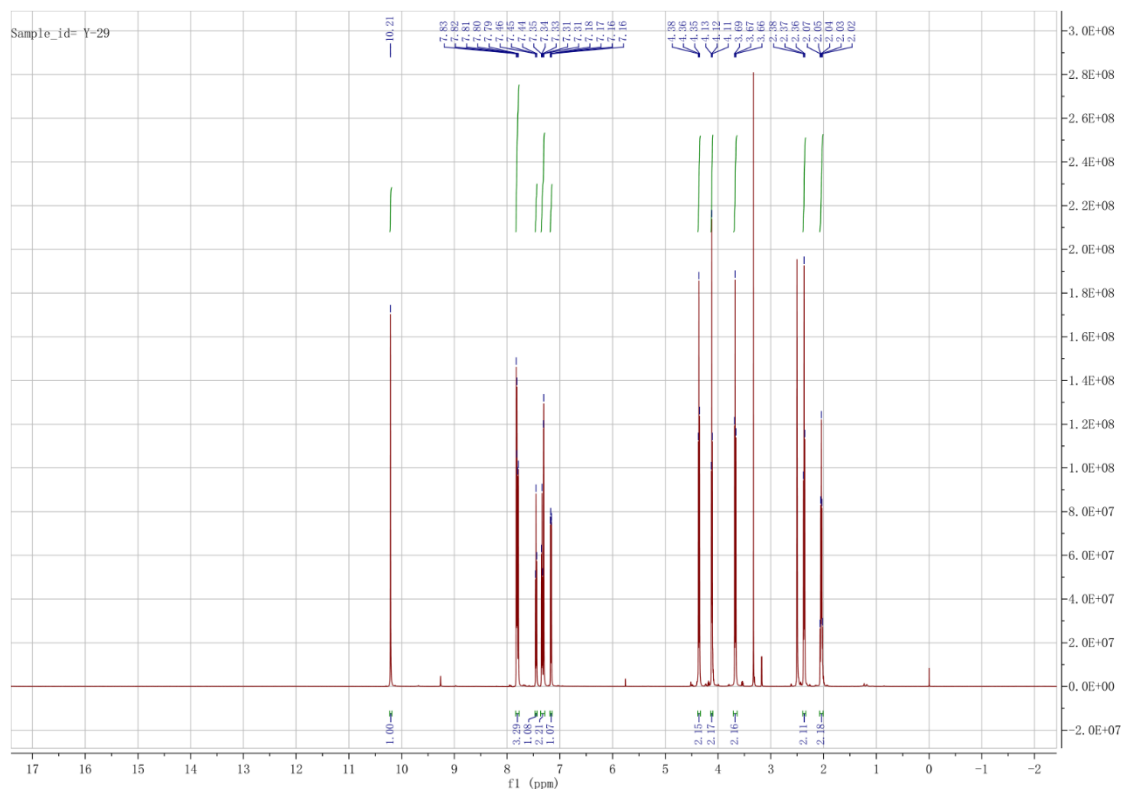

The  $^1\text{H}$ -NMR spectrum of compound Y-29

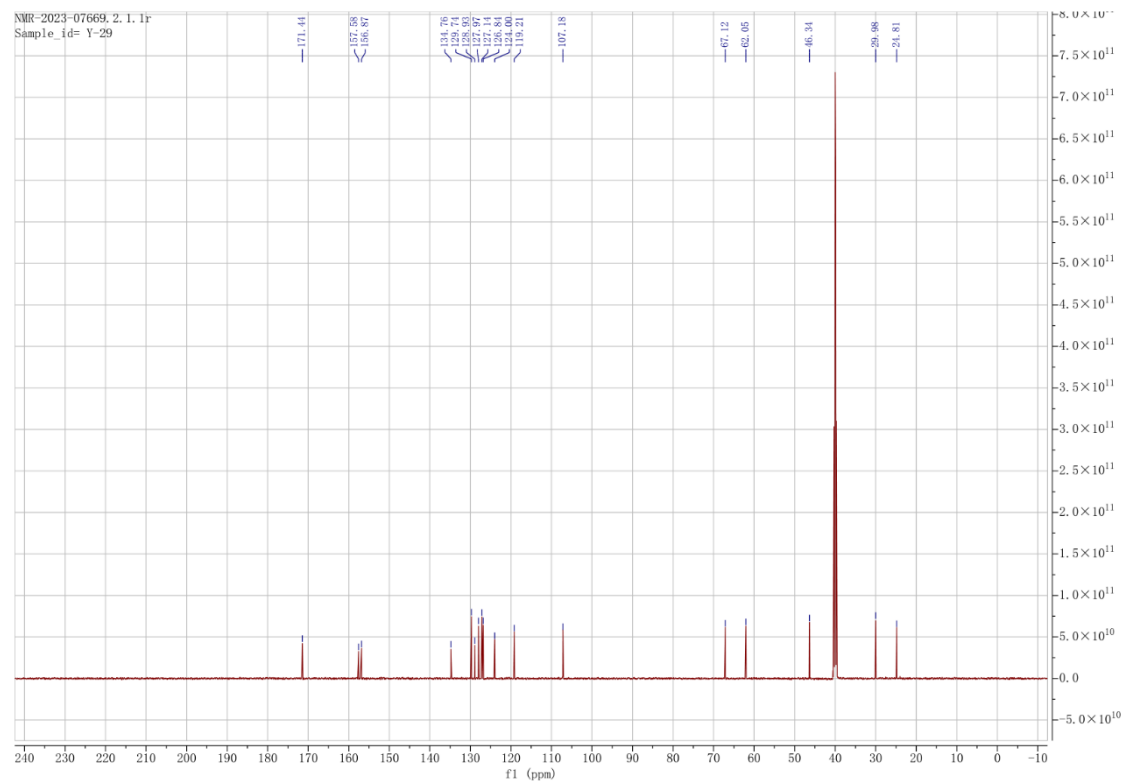

The  $^{13}\text{C}$  NMR spectrum of compound Y-29

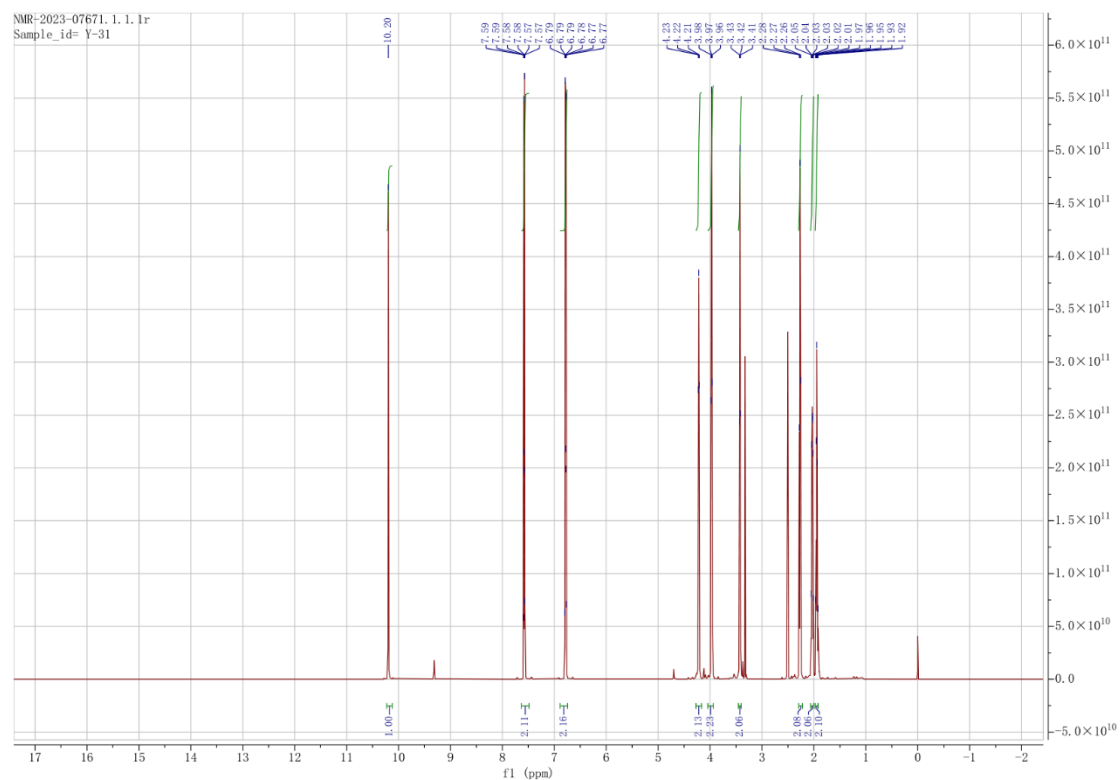

The  $^1\text{H}$ -NMR spectrum of compound Y-31

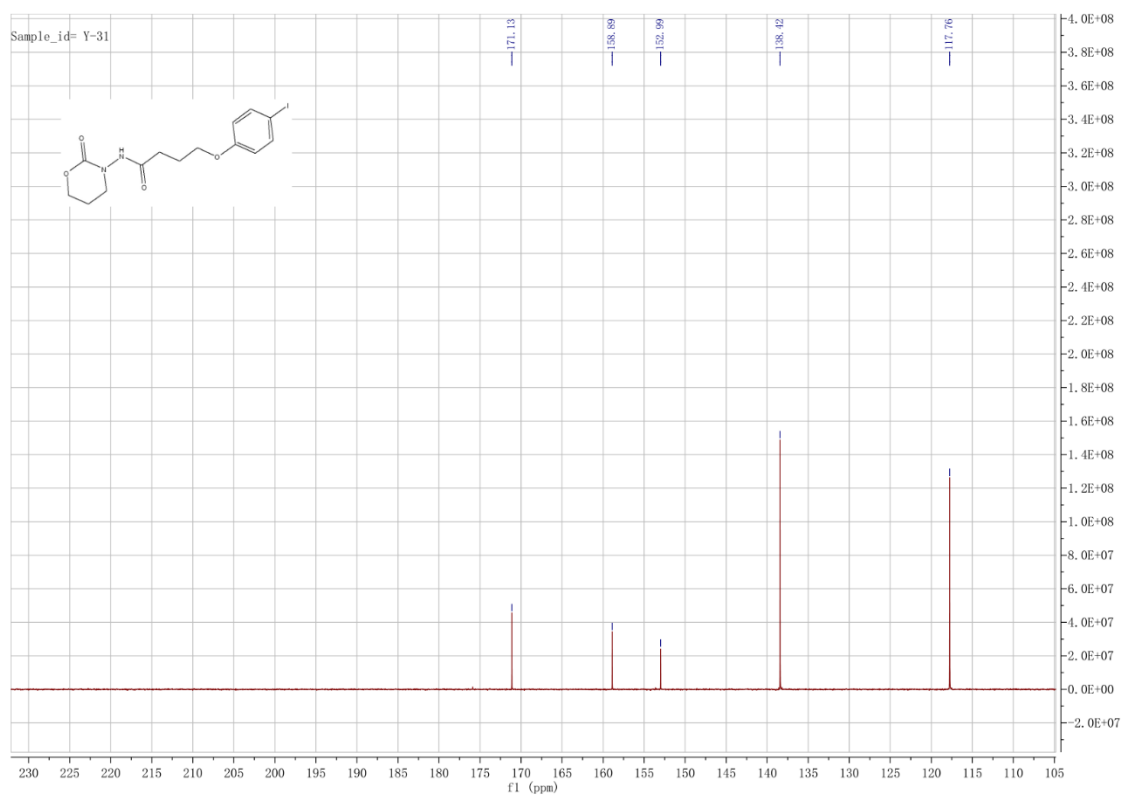

The  $^{13}\text{C}$  NMR spectrum of compound Y-31

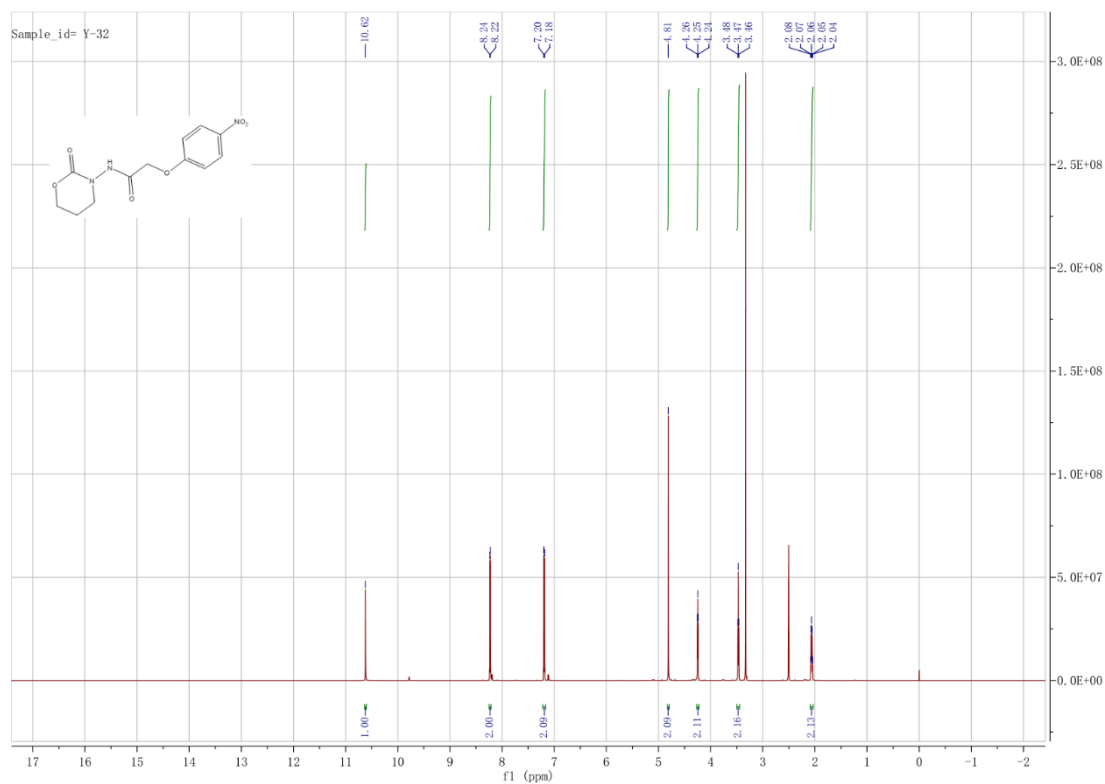

The  $^1\text{H}$ -NMR spectrum of compound Y-32

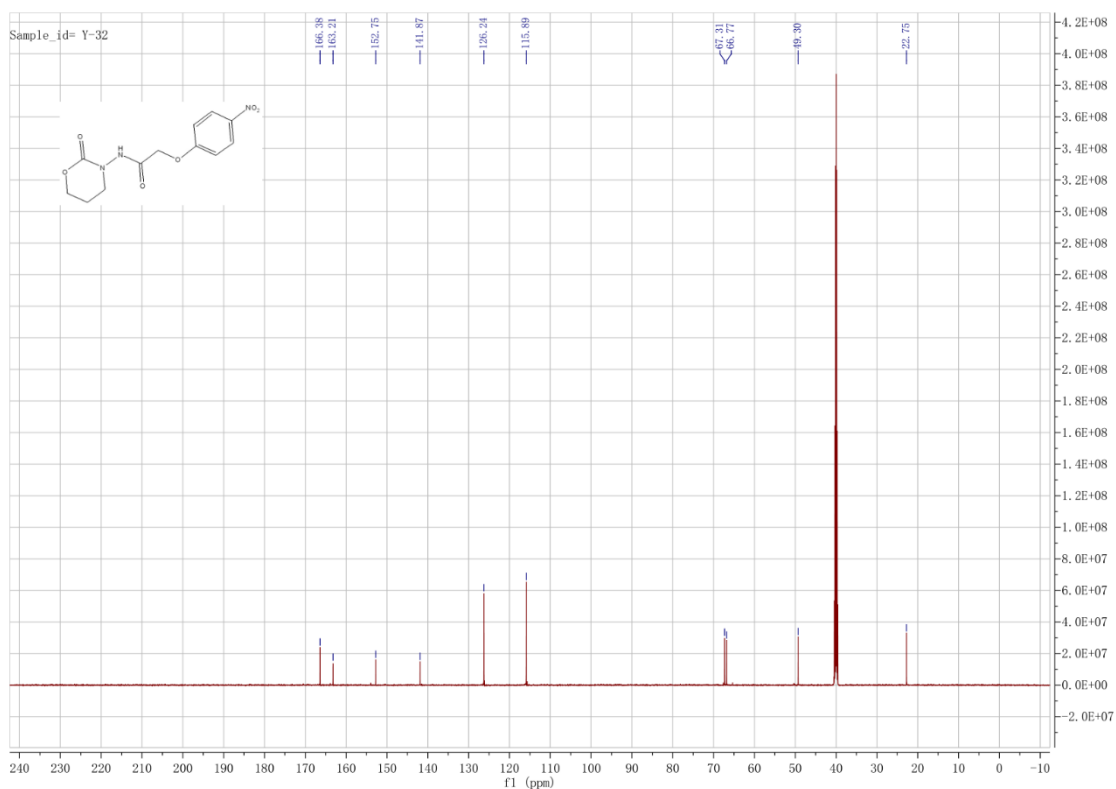

The  $^{13}\text{C}$  NMR spectrum of compound Y-32

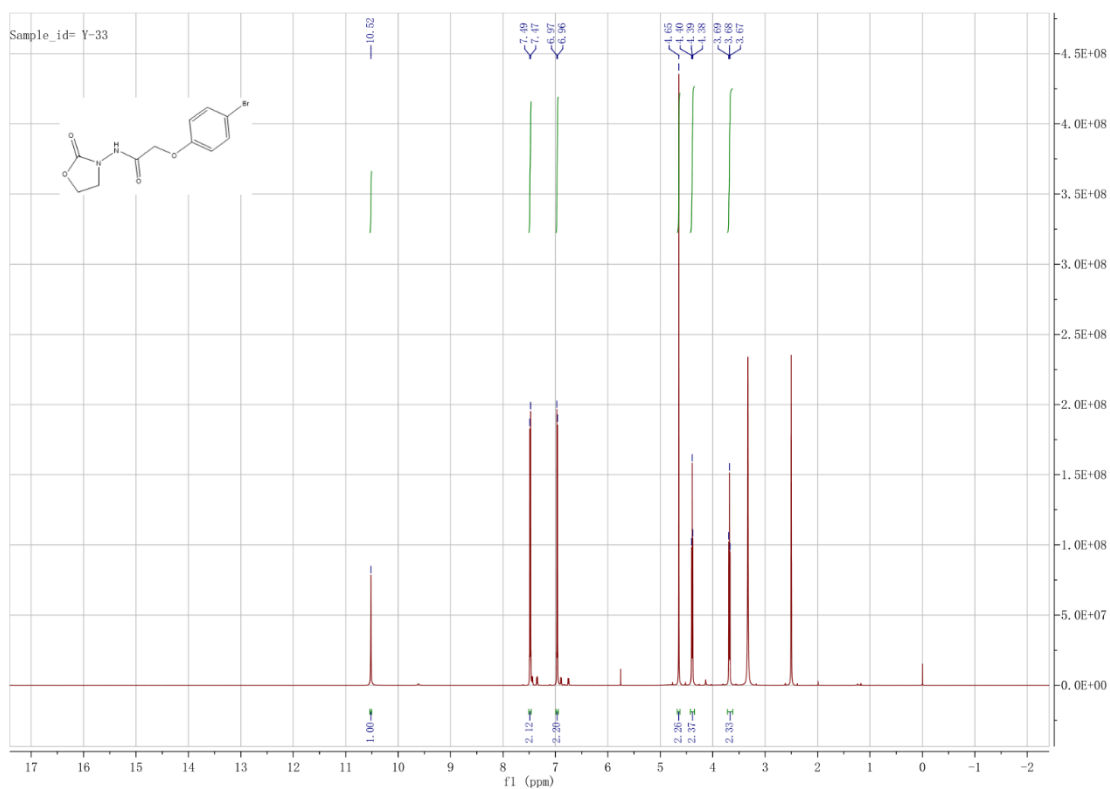

The  $^1\text{H}$ -NMR spectrum of compound Y-33

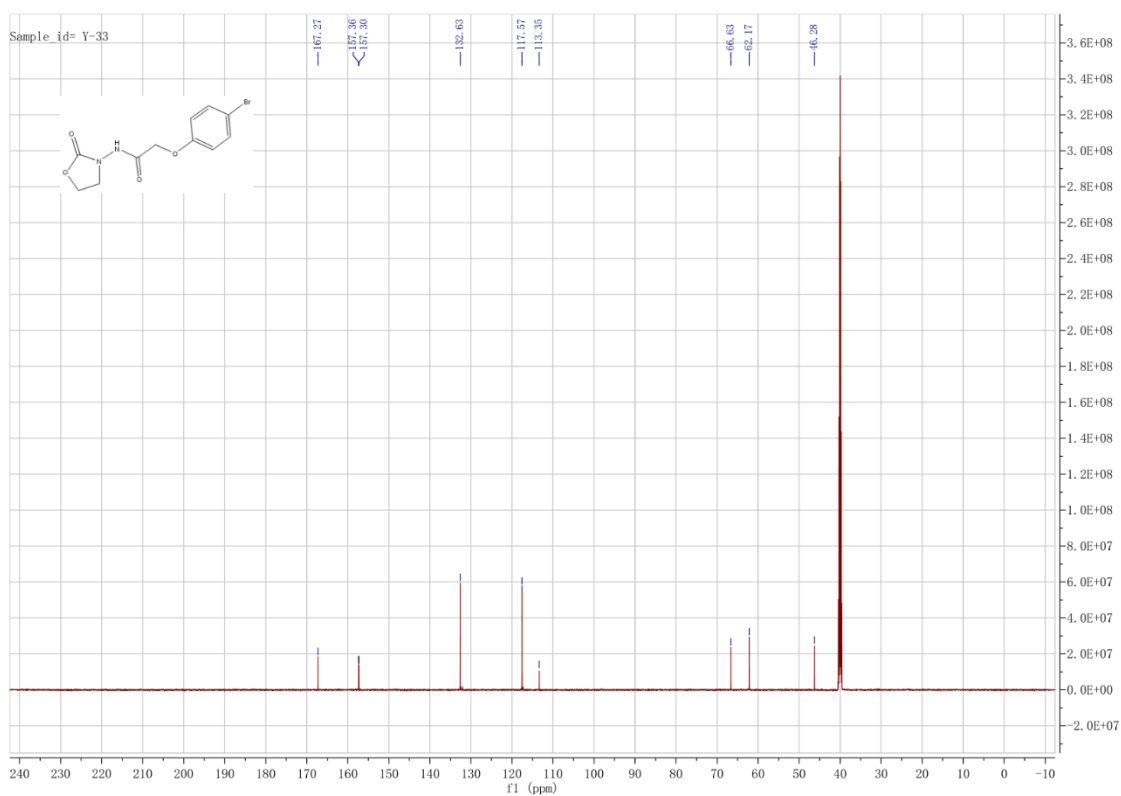

The  $^{13}\text{C}$  NMR spectrum of compound Y-33

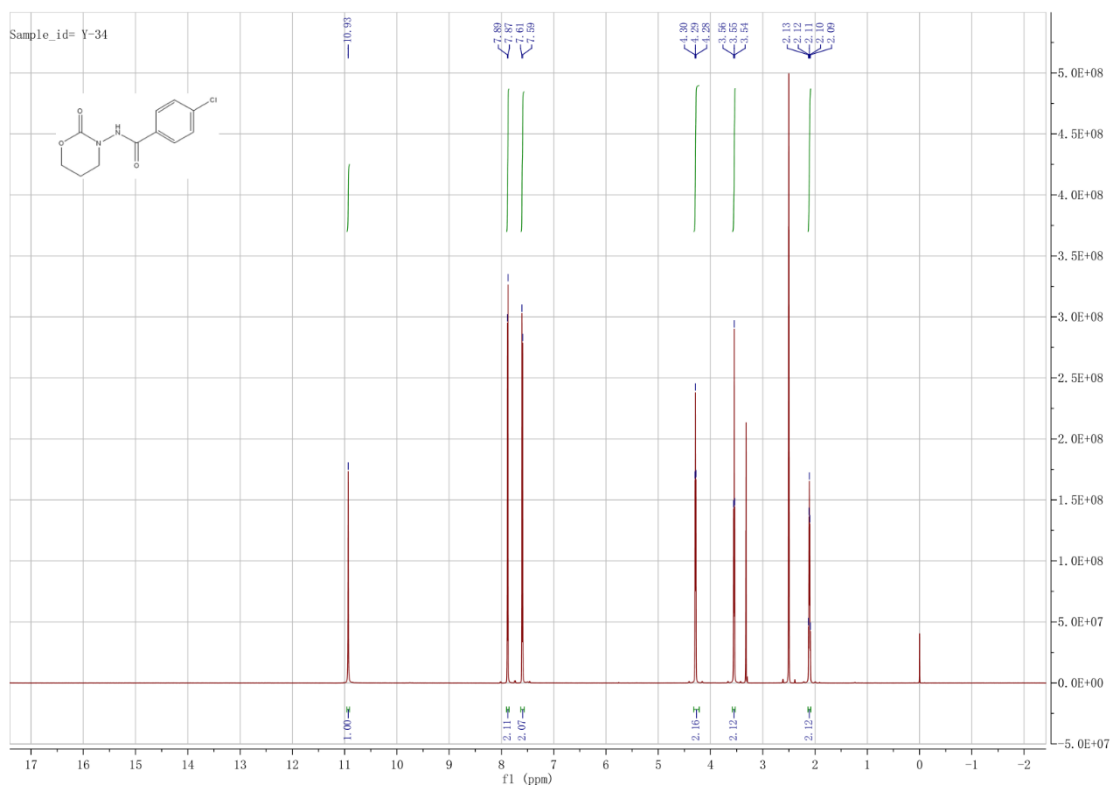

The  $^1\text{H}$ -NMR spectrum of compound Y-34

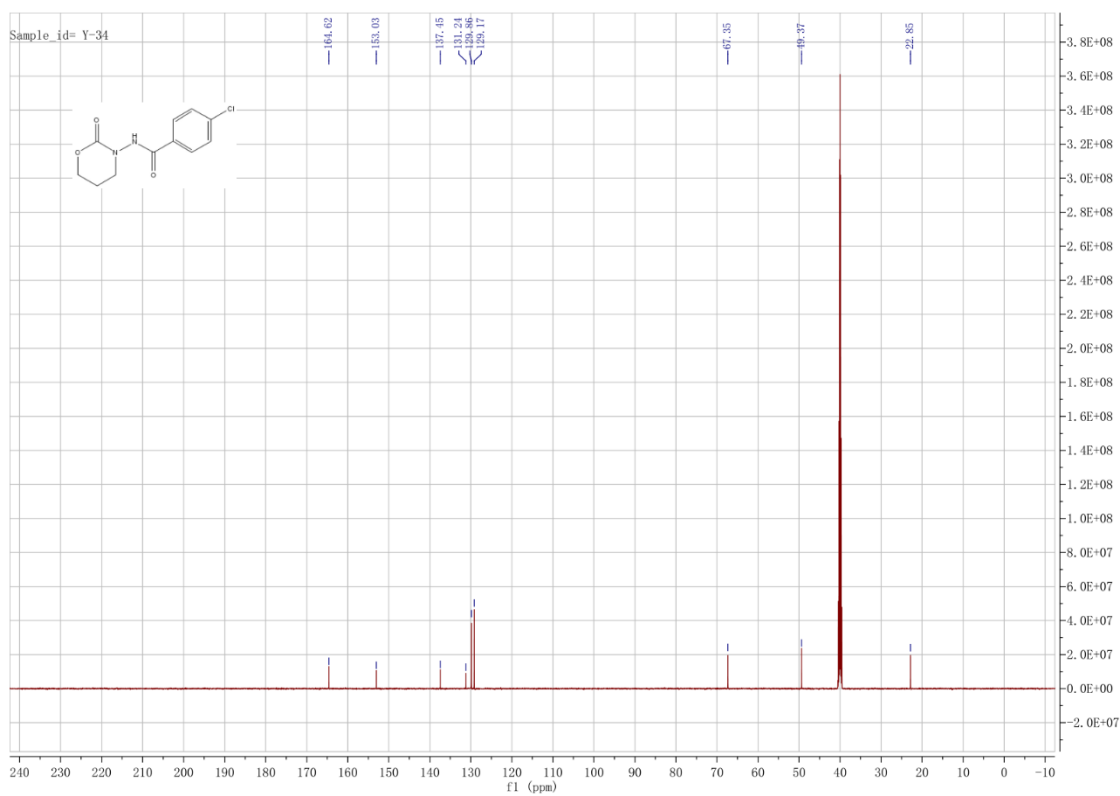

The  $^{13}\text{C}$  NMR spectrum of compound Y-34

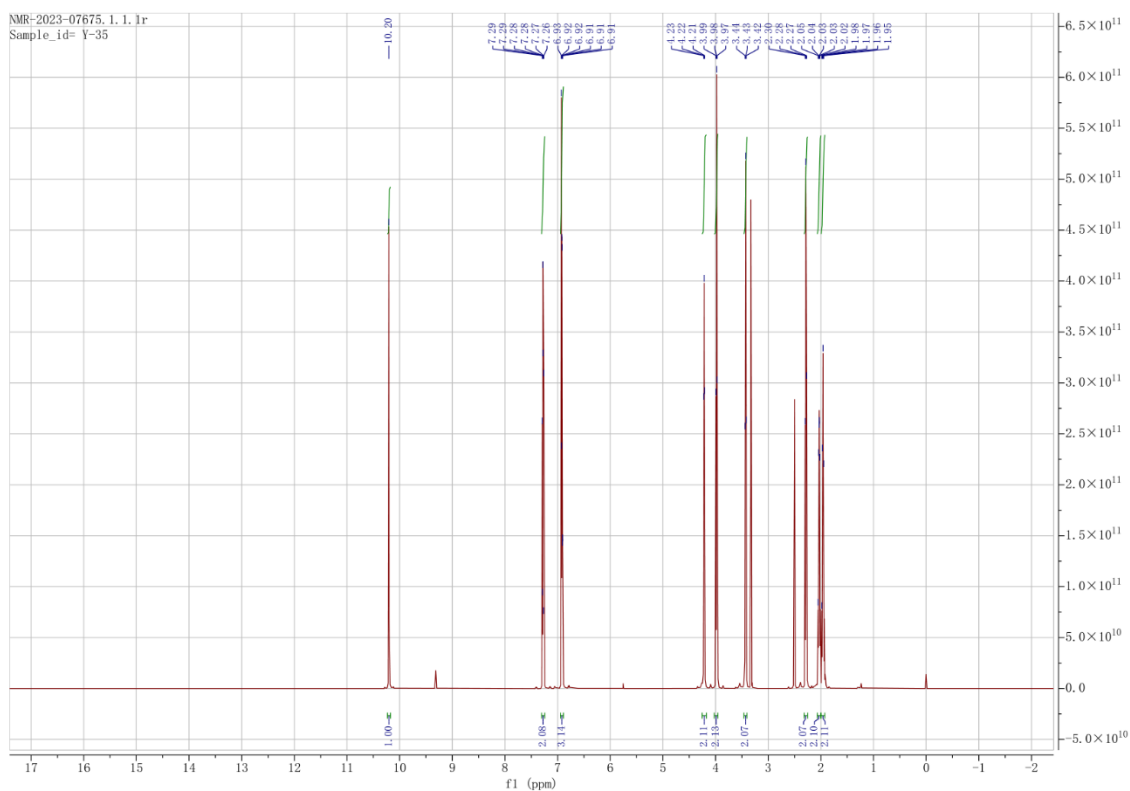



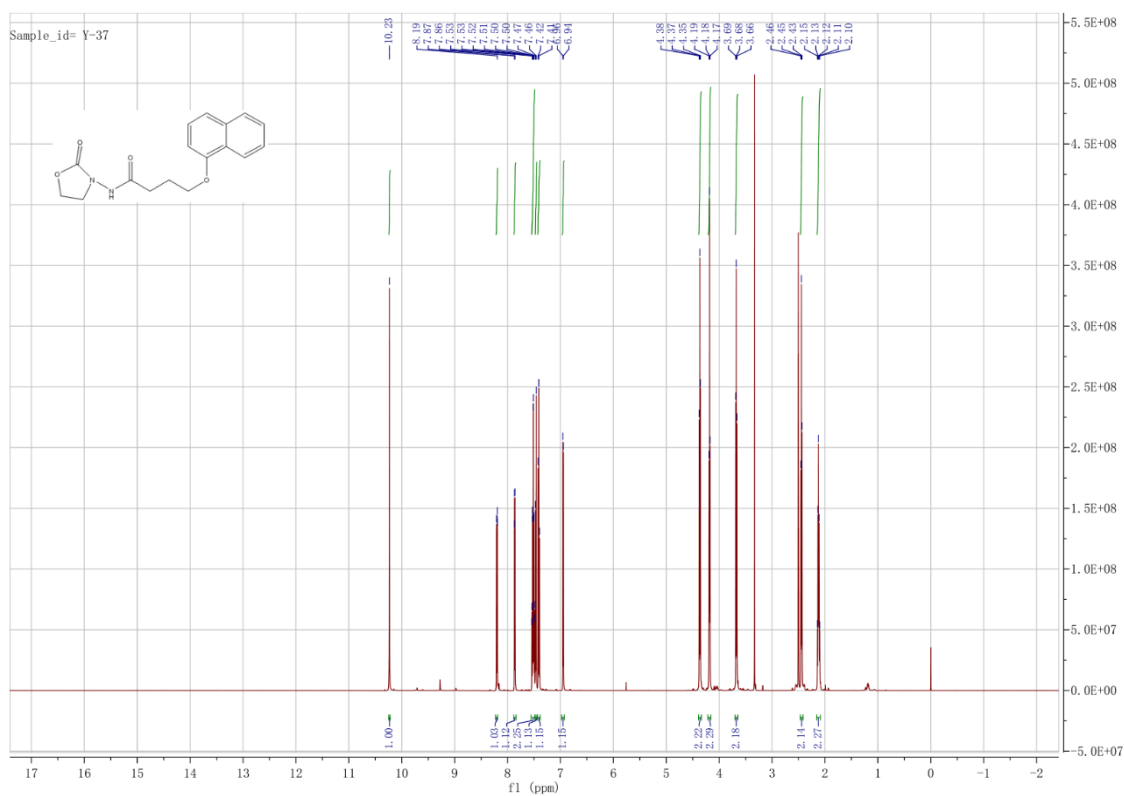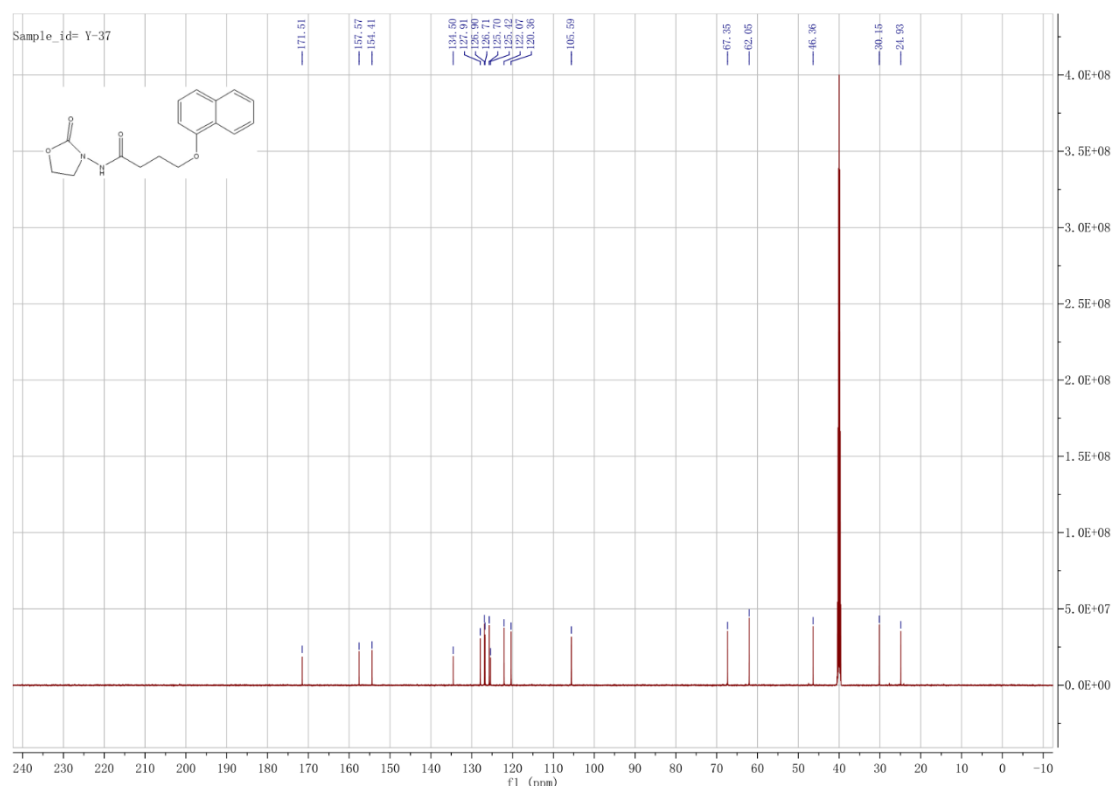

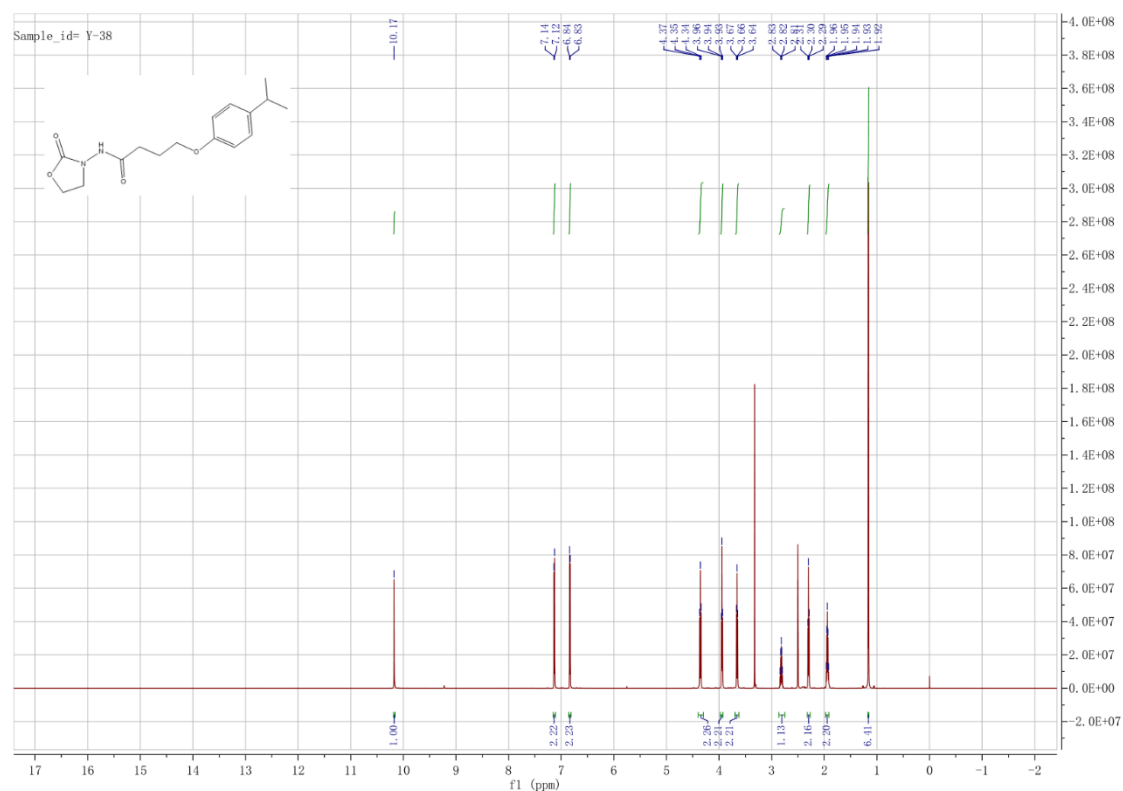

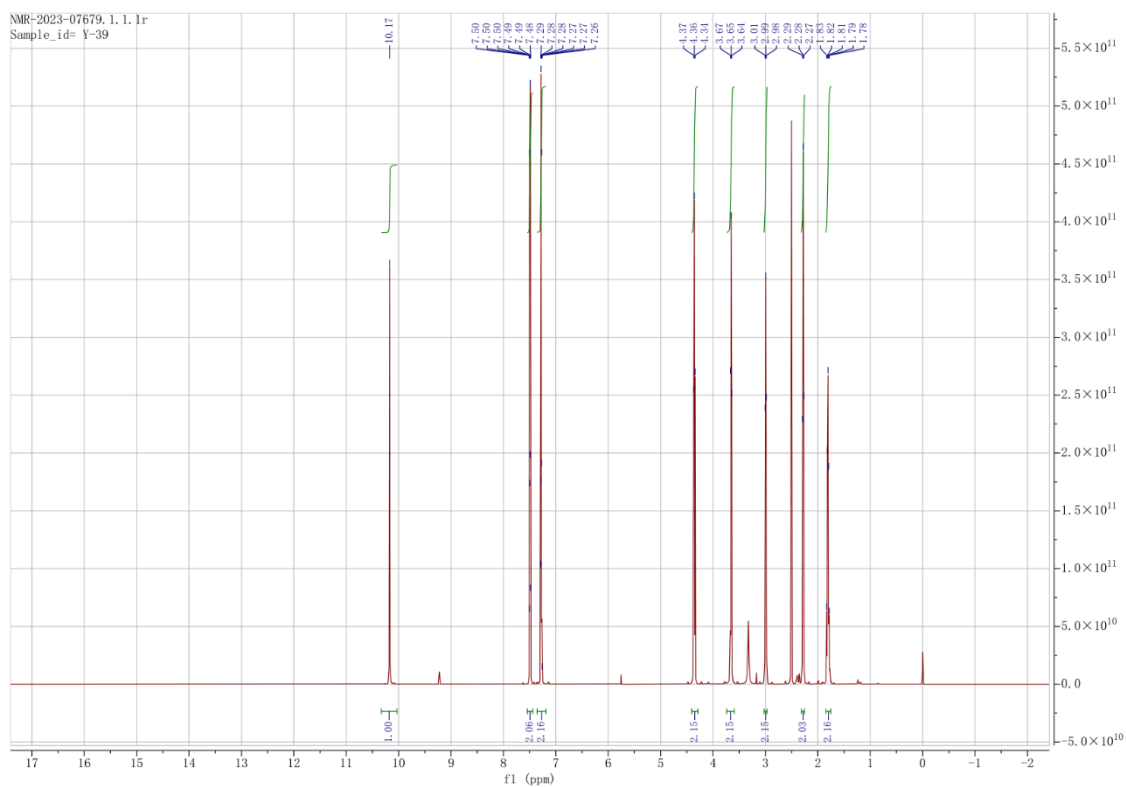

The  $^1\text{H}$ -NMR spectrum of compound Y-39

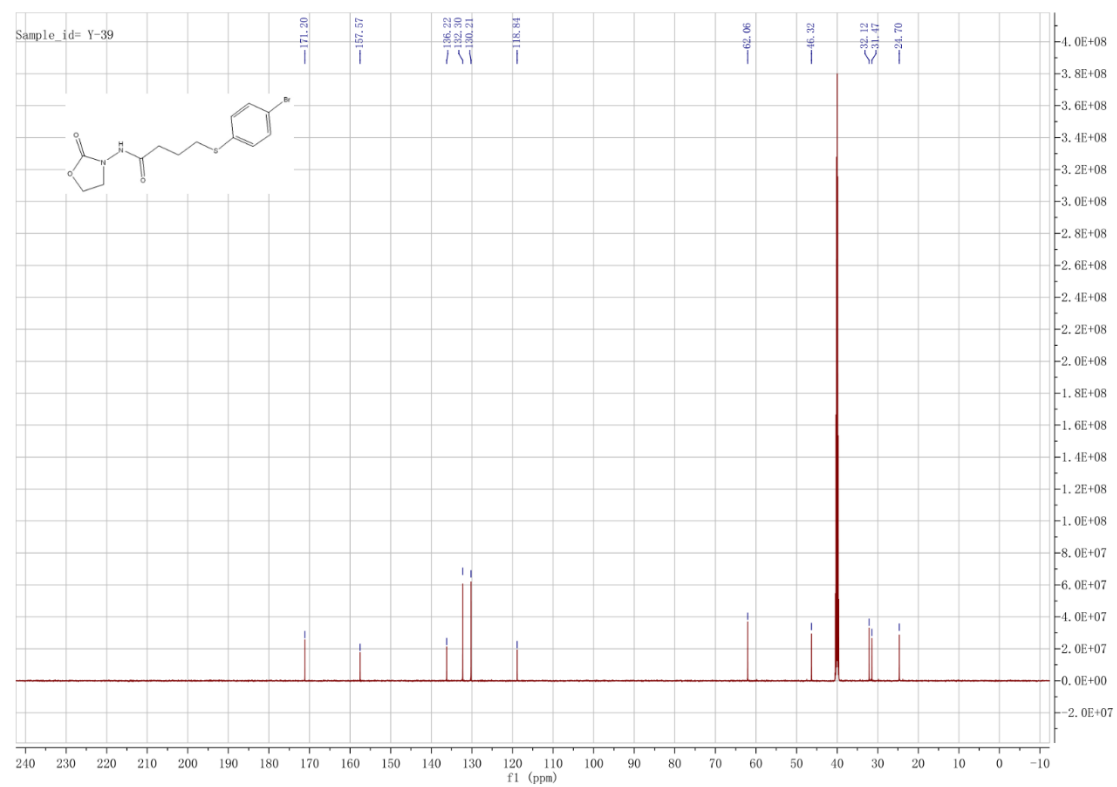

The  $^{13}\text{C}$  NMR spectrum of compound Y-39

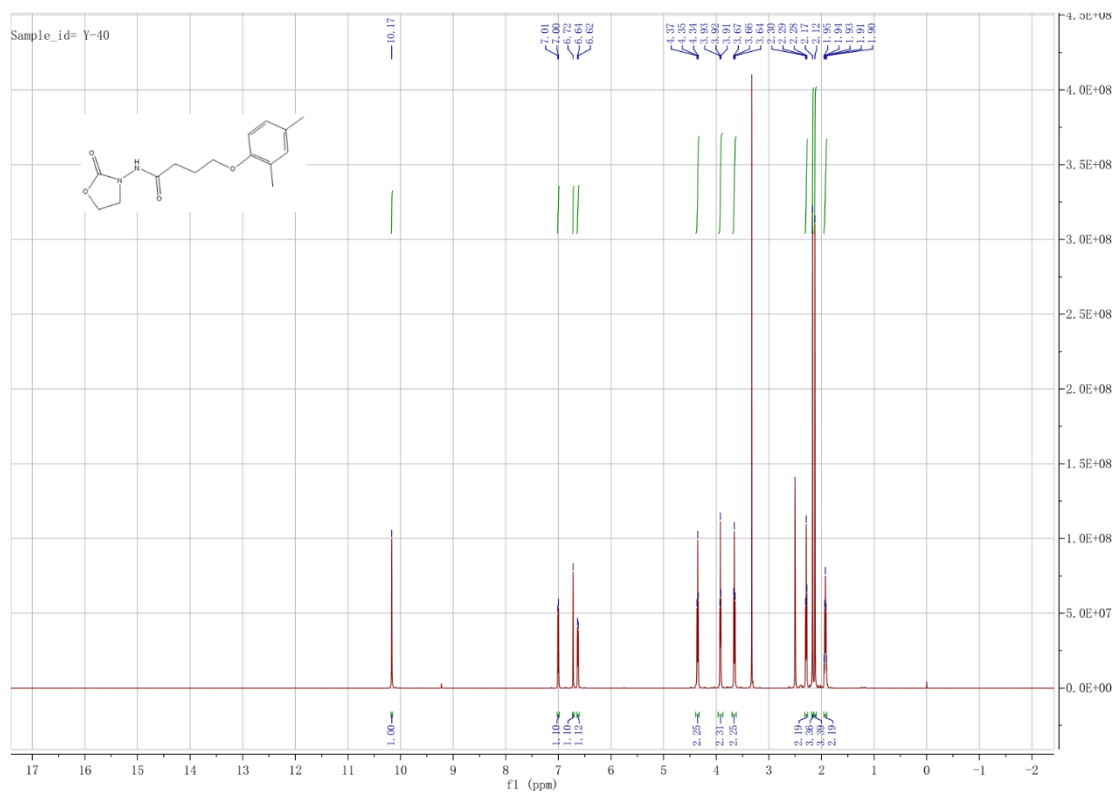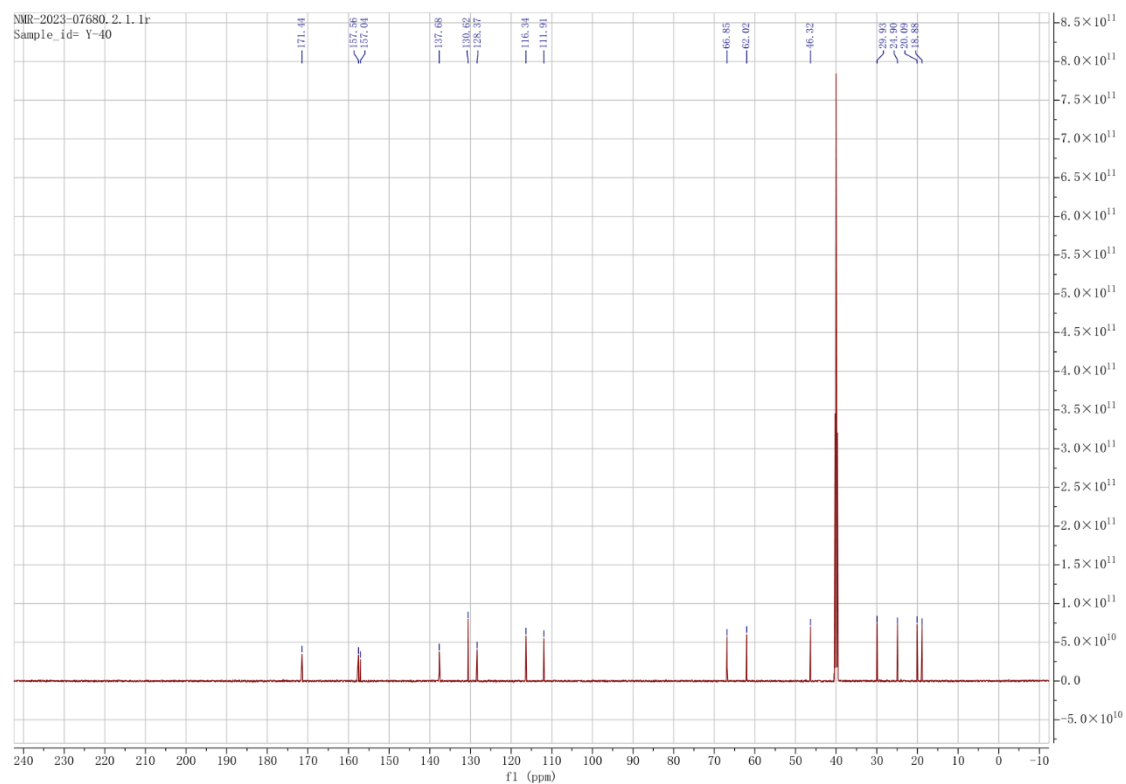

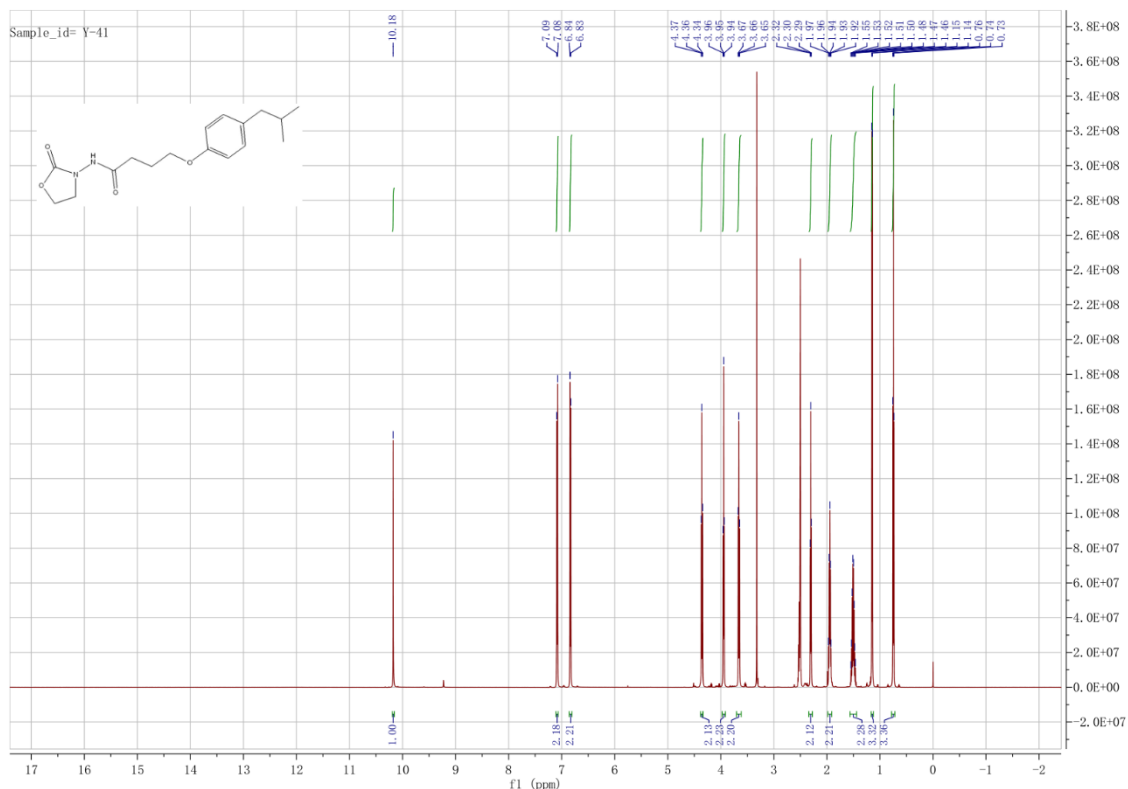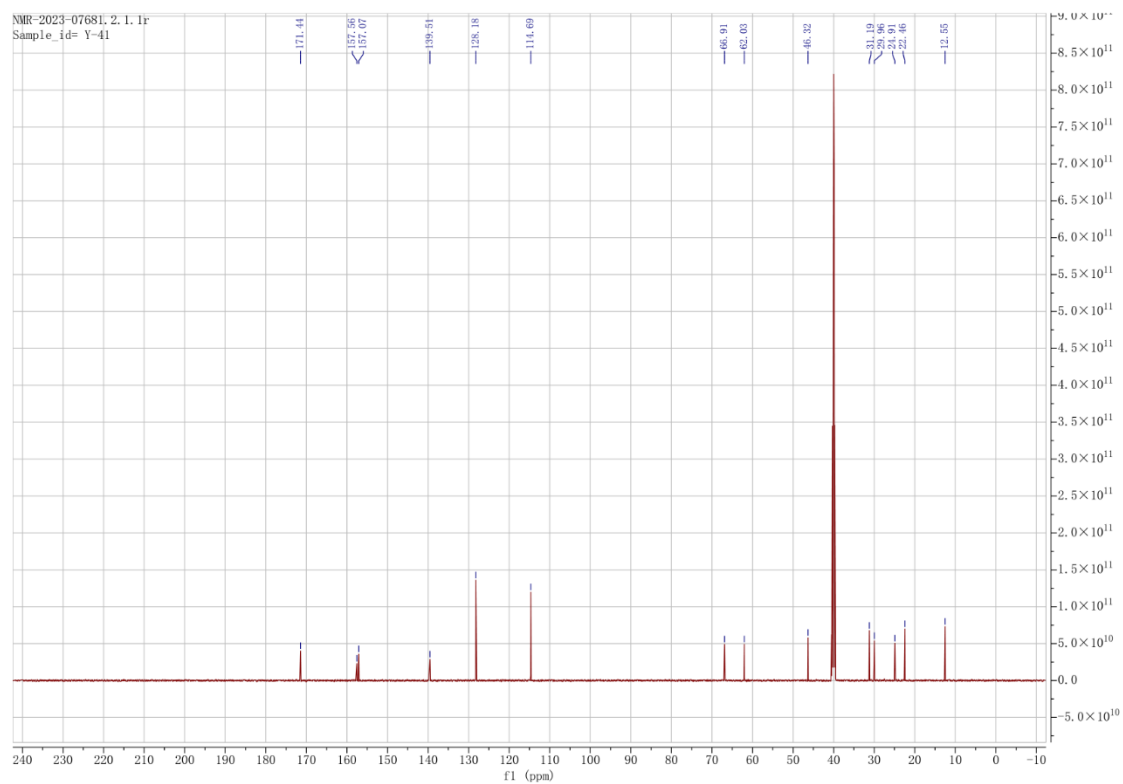

Supplement: s1 [file s1]
