# Supplementary material for: Design, Synthesis, and Biological Evaluation of the Quorum-Sensing Inhibitors of Pseudomonas aeruginosa PAO1
Source: MDPI journal article supplement (doi:10.3390/molecules29102211), 2024-05-08
Supplement: s1 [file s1]

# Supplemental information

## Design, synthesis, and biological evaluation of the quorum-sensing inhibitors of *Pseudomonas aeruginosa* PAO1

1 National Engineering Research Center for the Emergency Drug, State Key Laboratory of Toxicology and Medical Countermeasures, Beijing Institute of Pharmacology and Toxicology, Beijing 100850, China; yanxinlin11@163.com (X.Y.) houshi28@126.com (S.H.); jjaiachang@126.com (J.C.);

2 School of Pharmaceutical Sciences, Jilin University, Changchun 130021, China; xingcheng21@mails.jlu.edu.cn (C.X.)

3 School of Life Sciences, Jilin University, Changchun, 130012, China; yuanyuanz21@mails.jlu.edu.cn (Y.Z)

\* Correspondence: xiaojunhai@139.com (J.X); Tel.:01066931634

Table S1 Inhibition rate of biofilm by different compounds at different concentrations

| Inhibition ratio  |             |             |             |             |            |            |            |                          |
|-------------------|-------------|-------------|-------------|-------------|------------|------------|------------|--------------------------|
| concentratio<br>n | 15          | 25          | 26          | 29          | 31         | 37         | 39         | C <sub>10</sub> -<br>HSL |
| 325               | 0.3207      | 0.3217      | 0.3869      | 0.0907      | 0.409<br>8 | 0.181<br>6 | 0.212<br>4 | -<br>0.187<br>7          |
| 162.5             | 0.3385      | 0.3987      | 0.4457      | 0.4091      | 0.421<br>3 | 0.286<br>9 | 0.248<br>7 | 0.063                    |
| 81.25             | 0.3680      | 0.3335      | 0.4249      | 0.3466      | 0.395<br>4 | 0.364<br>4 | 0.284<br>1 | 0.002<br>5               |
| 40.625            | 0.2704      | 0.3219      | 0.3345      | 0.3273      | 0.404<br>4 | 0.351<br>5 | 0.234<br>2 | 0.022<br>5               |
| 20.3125           | 0.0672<br>5 | 0.1880<br>3 | 0.0216<br>6 | 0.0951<br>3 | 0.211      | 0.152<br>7 | 0.128<br>7 | -<br>0.043<br>5          |
